# Supplementary material for: Genetic diversity and comparative genomics across Leishmania (Viannia) species
Source: Research Square preprint supplement (doi:10.21203/rs.3.rs-4220115/v1), 2024-04-11
Supplement: Supplementary file 1 [file 116cdf79f1f1f3bfc7ded003.xlsx]

## Sheet: SupplTable1
Species (SNP clustering)	Species (Lab- classification)	Name Strain	Identification Methods	HSP70 sequencing	Environment
L. braziliensis	L. braziliensis	MHOM/CO/2013/UN0007	PHRH	No
L. braziliensis	L. braziliensis	MHOM/CO/2013/UN0010	PHRH	No
L. braziliensis	L. braziliensis	MHOM/CO/2013/UN0018	PHRH	No
L. braziliensis	L. braziliensis	MHOM/CO/2013/UN0023	PHRH	No
L. braziliensis	L. braziliensis	MHOM/CO/2013/UN0026	PHRH	No
L. braziliensis	L. braziliensis	MHOM/CO/2013/UN0002	PHRH, PHRB	No
L. braziliensis	L. braziliensis	MHOM/CO/2013/UN0036	PHRH	No
L. braziliensis	L. braziliensis	MHOM/CO/2013/UN0040	PHRH	No
L. braziliensis	L. braziliensis	MHOM/CO/2013/UN0042	PHRH	No
L. braziliensis	L. braziliensis	MHOM/CO/2013/UN0044	PHRH	No
L. braziliensis	L. braziliensis	MHOM/CO/2013/UN0045	PHRH	No
L. braziliensis	L. braziliensis	MHOM/CO/2013/UN0046	PHRH	No
L. braziliensis	L. braziliensis	MHOM/CO/2013/UN0047	PHRH	No
L. braziliensis	L. braziliensis	MHOM/CO/2013/UN0048	PHRH	No
L. braziliensis	L. braziliensis	MHOM/CO/2013/UN0053	PHRH	No
L. braziliensis	L. braziliensis	MHOM/CO/2013/UN0060	PHRH	No
L. braziliensis	L. braziliensis	MHOM/CO/2013/UN0057	PHRH, PHRB	No
L. braziliensis	L. braziliensis	MHOM/CO/2014/UN0061	PHRH, PHRB	No
L. braziliensis	L. braziliensis	MHOM/CO/2021/UN0066	PHRH	No
L. braziliensis	L. braziliensis	MHOM/CO/2013/UN0008	PHRH	No
L. braziliensis	L. braziliensis	MHOM/CO/2013/UN0009	PHRH	No
L. braziliensis	L. braziliensis	MHOM/CO/2013/UN0011	PHRH	No
L. braziliensis	L. braziliensis	MHOM/CO/2019/UN0028	PHRH	No
L. braziliensis	L. braziliensis	MHOM/CO/00/LL0015	MA	No
L. braziliensis	L. braziliensis	MHOM/CO/01/LL0017	MA, PI	No
L. braziliensis	L. braziliensis	MHOM/CO/07/LL0235	MA, IE, PM, PHRB	Yes
L. braziliensis	L. braziliensis	MHOM/CO/07/LL0249	MA, IE, PM, PMRH	No
L. braziliensis	L. braziliensis	MHOM/CO/08LL0301	MA	No
L. braziliensis	L. braziliensis	MHOM/CO/10/LL0384	IE, PM, PHRH, PMRH, PHRB	No
L. braziliensis	L. braziliensis	MHOM/CO/07/LL0230	MA, IE, PM, PMRH	No
L. braziliensis	L. braziliensis	W8102		No
L. braziliensis	L. braziliensis	W8229		No
L. braziliensis	L. braziliensis	MHOM/CO/2013/UN0041	PHRH	No
L. braziliensis X L. panamensis	L. braziliensis	W8252		No
L. panamensis	L. braziliensis	W7995		No
L. guyanensis	L. guyanensis	MHOM/CO/2018/UN0003	PHRH	No
L. guyanensis	L. guyanensis	MHOM/CO/15/LL0715	PM, PHRH, PMRH, PHRB	No
L. guyanensis	L. guyanensis	MHOM/CO/15/LL0729	PM, PHRH, PMRH, PHRB	No
L. guyanensis	L. guyanensis	MHOM/CO/15/LL0726	PM, PHRH, PMRH, PHRB	No
L. guyanensis X L. panamensis	L. guyanensis	MHOM/CO/2014/UN0063	PHRH	No
L. guyanensis X L. panamensis	L. guyanensis	MHOM/CO/2013/UN0043	PHRH	No
L. guyanensis X L. panamensis	L. guyanensis	MHOM/CO/2013/UN0049	PHRH	No
L. panamensis	L. guyanensis	MHOM/CO/16/LL0772	PHRH	No
L. panamensis	L. guyanensis	MHOM/CO/15/LL0735	PM, PHRH, PMRH, PHRB	No
L. guyanensis	L. guyanensis	MHOM/CO/08/LL0303	MA, IE, PM, PHRH, PMRH, PHRB	No
L. guyanensis X L. panamensis	L. guyanensis	MHOM/CO/2018/UN0005	PHRH	No
L. guyanensis X L. braziliensis	L. guyanensis/panamensis	MHOM/CO/15/LL0725	PM, PHRH, PMRH, PHRB	Yes
L. infantum/mexicana	L. infantum/mexicana	MHOM/CO/04/LL0087	MA, PHRH	Yes
L. guyanensis	L. panamensis	W8104		No
L. guyanensis X L. panamensis	L. panamensis	W8134		No
L. panamensis	L. panamensis	MHOM/CO/07/LL0245	MA, IE, PM	Yes
L. panamensis	L. panamensis	MHOM/CO/05/LL0112	MA, PM, PMRH	No
L. panamensis	L. panamensis	MHOM/CO/12/LL0536	PM, PHRH, PMRH, PHRB	No
L. panamensis	L. panamensis	W6958		No
L. panamensis	L. panamensis	W7046		No
L. panamensis	L. panamensis	W7056		No
L. panamensis	L. panamensis	W7058		No
L. panamensis	L. panamensis	W8046		No
L. panamensis	L. panamensis	W8109		No
L. panamensis	L. panamensis	W8169		No
L. panamensis	L. panamensis	W8194		No
L. panamensis	L. panamensis	W8215		No
L. panamensis	L. panamensis	W8232		No
L. panamensis	L. panamensis	W8242		No
L. panamensis	L. panamensis	W8244		No
L. panamensis X L. infantum/mexicana	L. panamensis	MHOM/CO/12/LL0490	MA, IE, PM, PHRH, PMRH	No
			MA for Monoclonal antibodies
			IE for Isoenzymes
			PI for PCR ITS
			PM for PCR Miniexon
			PMRH for PCR Miniexon/RFLP HaeIII
			PHRH for PCR HSP70/RFLP HaeII
			PHRB for PCR HSP70/RFLP BccI

## Sheet: SupplTable2
Species	Name Strain	Collection	SRA	Date collection	Cite
L. braziliensis	Lb7933	Bolivia	ERR3988465	NA	Patiño et al 2020
L. braziliensis	MHOM/BO/94/CUM29	Bolivia:Parque Isiboro	ERR471302	1994	Van den Broeck et al., 2020
L. braziliensis	MHOM/BR/75/M2903	Brazil	SRR1028154	1975
L. braziliensis	MHOM/BR/75/M2904	Brazil	ERR013296	1975
L. braziliensis	MHOM/BR/2001/JS	Brazil:Pernambuco	SRR7293733	2001	Figueiredo et al., 2019
L. braziliensis	MHOM/BR/2002/JCS	Brazil:Pernambuco	SRR7293734	2002	Figueiredo et al., 2019
L. braziliensis	MHOM/BR/2002/GBS	Brazil:Pernambuco	SRR7293739	2002	Figueiredo et al., 2019
L. braziliensis	MHOM/BR/2005/TISO	Brazil:Pernambuco	SRR7293740	2005	Figueiredo et al., 2019
L. braziliensis	MHOM/BR/1996/MGFS	Brazil:Pernambuco	SRR7293741	1996	Figueiredo et al., 2019
L. braziliensis	MHOM/BR/2005/JAS	Brazil:Pernambuco	SRR7293742	2005	Figueiredo et al., 2019
L. braziliensis	MHOM/BR/2001/JC	Brazil:Pernambuco	SRR7293735	2001	Figueiredo et al., 2019
L. braziliensis	MNEC/BR/2003/191	Brazil:Pernambuco	SRR7293736	2003	Figueiredo et al., 2019
L. braziliensis	MHOM/BR/2006/MVRGR	Brazil:Pernambuco	SRR7293737	2006	Figueiredo et al., 2019
L. braziliensis	MHOM/BR/2000/TSS	Brazil:Pernambuco	SRR7293738	2000	Figueiredo et al., 2019
L. braziliensis	MHOM/CO/2013/UN0041	Colombia:Amazonia, Caqueta:Cartagena de Chaira	SRR28554041	2013	This study
L. braziliensis	MHOM/CO/2014/UN0061	Colombia:Amazonia, Caqueta:Cartagena de Chaira	SRR28554058	2014	This study
L. braziliensis	MHOM/CO/2013/UN0042	Colombia:Amazonia, Caqueta:Florencia	SRR28554003	2013	This study
L. braziliensis	MHOM/CO/2013/UN0057	Colombia:Amazonia, Caqueta:Florencia	SRR28554059	2013	This study
L. braziliensis	MHOM/CO/2019/UN0028	Colombia:Amazonia, Caqueta:Florencia	SRR28554052	2019	This study
L. braziliensis	MHOM/CO/2013/UN0047	Colombia:Amazonia, Caqueta:San Vicente del Caguan	SRR28554063	2013	This study
L. braziliensis	MHOM/CO/2013/UN0023	Colombia:Amazonia, Putumayo:Puerto Asis	SRR28554044	2013	This study
L. braziliensis	MHOM/CO/2013/UN0040	Colombia:Amazonia, Putumayo:Puerto Guzman	SRR28554004	2013	This study
L. braziliensis	Lb7616	Colombia:Amazonia, Vaupes	ERR3988462	NA	Patiño et al 2020
L. braziliensis	MHOM/CO/2013/UN0007	Colombia:Amazonia, Vaupes:Caruru	SRR28554067	2013	This study
L. braziliensis	W8252	Colombia:Andina, Antioquia	SRR28554040	2019	This study
L. braziliensis	Lb7864	Colombia:Andina, Antioquia	ERR3988464	NA	Patiño et al 2020
L. braziliensis	W8229	Colombia:Andina, Antioquia:Caucasia	SRR28554042	2019	This study
L. braziliensis	W7995	Colombia:Andina, Caldas:Victoria	SRR28554039	2018	This study
L. braziliensis	MHOM/CO/07/LL0249	Colombia:Andina, Cundinamarca:El colegio	SRR28554048	2007	This study
L. braziliensis	MHOM/CO/07/LL0235	Colombia:Andina, Cundinamarca:Nilo	SRR28554049	2007	This study
L. braziliensis	MHOM/CO/01/LL0017	Colombia:Andina, Cundinamarca:Villeta	SRR28554050	2001	This study
L. braziliensis	MHOM/CO/00/LL0015	Colombia:Andina, Cundinamarca:Viota	SRR28554051	2000	This study
L. braziliensis	MHOM/CO/10/LL0384	Colombia:Andina, Cundinamarca:Viota	SRR28554046	2010	This study
L. braziliensis	MHOM/CO/08/LL0301	Colombia:Andina, Santander:Cimitarra	SRR28554047	2008	This study
L. braziliensis	MHOM/CO/07/LL0230	Colombia:Andina, Santander:Palmas del Socorro	SRR28554045	2007	This study
L. braziliensis	Lb8102	Colombia:Caribe, Guajira:Dibulla	ERR3988467	NA	Patiño et al 2020
L. braziliensis	W8102	Colombia:Caribe, Guajira:Dibulla	SRR28554043	2018	This study
L. braziliensis	MHOM/CO/2013/UN0002	Colombia:Orinoquia, Guainia:Barrancominas	SRR28554022	2013	This study
L. braziliensis	MHOM/CO/2013/UN0060	Colombia:Orinoquia, Guainia:Inirida	SRR28554060	2013	This study
L. braziliensis	MHOM/CO/2013/UN0046	Colombia:Orinoquia, Guaviare:Calamar	SRR28554064	2013	This study
L. braziliensis	Lb7529	Colombia:Orinoquia, Meta	ERR3988461	NA	Patiño et al 2020
L. braziliensis	Lb8025	Colombia:Orinoquia, Meta	ERR3988466	NA	Patiño et al 2020
L. braziliensis	MHOM/CO/2013/UN0045	Colombia:Orinoquia, Meta:Fuente de oro	SRR28554065	2013	This study
L. braziliensis	MHOM/CO/2013/UN0008	Colombia:Orinoquia, Meta:Fuente de oro	SRR28554056	2013	This study
L. braziliensis	MHOM/CO/2013/UN0010	Colombia:Orinoquia, Meta:La macarena	SRR28554066	2013	This study
L. braziliensis	MHOM/CO/2021/UN0066	Colombia:Orinoquia, Meta:La macarena	SRR28554057	2021	This study
L. braziliensis	MHOM/CO/2013/UN0011	Colombia:Orinoquia, Meta:La macarena	SRR28554053	2013	This study
L. braziliensis	MHOM/CO/2013/UN0018	Colombia:Orinoquia, Meta:La uribe	SRR28554055	2013	This study
L. braziliensis	MHOM/CO/2013/UN0026	Colombia:Orinoquia, Meta:Vistahermosa	SRR28554033	2013	This study
L. braziliensis	MHOM/CO/2013/UN0036	Colombia:Orinoquia, Meta:Vistahermosa	SRR28554011	2013	This study
L. braziliensis	MHOM/CO/2013/UN0044	Colombia:Orinoquia, Meta:Vistahermosa	SRR28554002	2013	This study
L. braziliensis	MHOM/CO/2013/UN0048	Colombia:Orinoquia, Meta:Vistahermosa	SRR28554062	2013	This study
L. braziliensis	MHOM/CO/2013/UN0053	Colombia:Orinoquia, Meta:Vistahermosa	SRR28554061	2013	This study
L. braziliensis	MHOM/CO/2013/UN0009	Colombia:Orinoquia, Meta:Vistahermosa	SRR28554054	2013	This study
L. braziliensis	MHOM/PE/02/LH2210(PER010)	Peru:Cajamarca	ERR449701	2002	Van den Broeck et al., 2020
L. braziliensis	MHOM/PE/91/LC1565	Peru:Cusco	ERR377654	1991	Van den Broeck et al., 2020
L. braziliensis	MHOM/PE/01/LH2217(PER012)	Peru:Cusco	ERR449703	2001	Van den Broeck et al., 2020
L. braziliensis	MHOM/PE/02/LH2287(PER065)	Peru:Cusco	ERR449705	2002	Van den Broeck et al., 2020
L. braziliensis	MHOM/PE/91/LC1409	Peru:Huanuco	ERR377652	1991	Van den Broeck et al., 2020
L. braziliensis	MHOM/PE/94/LC2452	Peru:Huanuco	ERR3150808	1994	Van den Broeck et al., 2020
L. braziliensis	MHOM/PE/94/LC2551	Peru:Huanuco	ERR3150811	1994	Van den Broeck et al., 2020
L. braziliensis	MHOM/PE/95/LC2873	Peru:Huanuco	ERR3150813	1995	Van den Broeck et al., 2020
L. braziliensis	MHOM/PE/02/LH2224(PER016)	Peru:Huanuco	ERR449704	2002	Van den Broeck et al., 2020
L. braziliensis	MHOM/PE/02/LH2356(PER094)	Peru:Huanuco	ERR449709	2002	Van den Broeck et al., 2020
L. braziliensis	MHOM/PE/01/LH2033(PER014)	Peru:Junín	ERR449697	2001	Van den Broeck et al., 2020
L. braziliensis	MHOM/PE/01/LH2182(PER005)	Peru:Loreto	ERR449700	2001	Van den Broeck et al., 2020
L. braziliensis	MHOM/PE/03/PER201	Peru:Loreto	ERR877277	2003	Van den Broeck et al., 2020
L. braziliensis	MHOM/PE/01/LH2162(PER002)	Peru:Madre de Dios	ERR449699	2001	Van den Broeck et al., 2020
L. braziliensis	MHOM/PE/02/LH2330(PER069)	Peru:Madre de Dios	ERR449707	2002	Van den Broeck et al., 2020
L. braziliensis	MHOM/PE/03/PER260	Peru:Madre de Dios	ERR471299	2003	Van den Broeck et al., 2020
L. braziliensis	MHOM/PE/02/LH2332(PER086)	Peru:Pasco	ERR449708	2002	Van den Broeck et al., 2020
L. braziliensis	MHOM/PE/90/LH825	Peru:Ucayali	ERR3150805	1990	Van den Broeck et al., 2020
L. braziliensis	MHOM/PE/03/PER215	Peru:Ucayali	ERR877280	2003	Van den Broeck et al., 2020
L. braziliensis x L. peruviana	MCAN/PE/95/HR410	Peru:Huanuco	ERR3150817	1995	Van den Broeck et al., 2020
L. braziliensis x L. peruviana	MCAN/PE/95/HR80	Peru:Huanuco	ERR3150816	1995	Van den Broeck et al., 2020
L. braziliensis x L. peruviana	MHOM/PE/91/LC1407	Peru:Huanuco	ERR662635	1991	Van den Broeck et al., 2020
L. braziliensis x L. peruviana	MHOM/PE/91/LC1408	Peru:Huanuco	ERR662633	1991	Van den Broeck et al., 2020
L. braziliensis x L. peruviana	MHOM/PE/91/LC1418	Peru:Huanuco	ERR662632	1991	Van den Broeck et al., 2020
L. braziliensis x L. peruviana	MHOM/PE/91/LC1419	Peru:Huanuco	ERR662636	1991	Van den Broeck et al., 2020
L. braziliensis x L. peruviana	MHOM/PE/94/LC2435	Peru:Huanuco	ERR3150807	1994	Van den Broeck et al., 2020
L. braziliensis x L. peruviana	MHOM/PE/94/LC2520	Peru:Huanuco	ERR3150810	1994	Van den Broeck et al., 2020
L. braziliensis x L. peruviana	MHOM/PE/95/LC2851	Peru:Huanuco	ERR3150812	1995	Van den Broeck et al., 2020
L. braziliensis x L. peruviana	MHOM/PE/95/LC2877	Peru:Huanuco	ERR3150814	1995	Van den Broeck et al., 2020
L. braziliensis x L. peruviana	MHOM/PE/91/LH1099	Peru:Huanuco	ERR662634	1991	Van den Broeck et al., 2020
L. braziliensis x L. peruviana	MHOM/PE/02/LH2215(PER011)	Peru:Huanuco	ERR449702	2002	Van den Broeck et al., 2020
L. guyanensis	MHOM/BR/75/M4147	Brazil	SRR18089495	1975
L. guyanensis	MCAN/CO/1985/CL-085	Colombia	ERR205773	1985	Coughlan et al 2018
L. guyanensis	MHOM/CO/15/LL0735	Colombia:Amazonia, Putumayo:Puerto Asis	SRR28554029	2016	This study
L. guyanensis	MHOM/CO/16/LL0772	Colombia:Amazonia, Putumayo:Villagarzon	SRR28554030	2016	This study
L. guyanensis	MHOM/CO/15/LL0725	Colombia:Andina, Boyaca:Muzo	SRR28554026	2016	This study
L. guyanensis	MHOM/CO/15/LL0715	Colombia:Andina, Tolima:Rioblanco	SRR28554037	2015	This study
L. guyanensis	MHOM/CO/15/LL0726	Colombia:Andina, Tolima:Rioblanco	SRR28554035	2016	This study
L. guyanensis	MHOM/CO/15/LL0729	Colombia:Andina, Tolima:Rioblanco	SRR28554036	2016	This study
L. guyanensis	MHOM/CO/2018/UN0003	Colombia:Andina, Tolima:Rovira	SRR28554038	2018	This study
L. guyanensis	MHOM/CO/2014/UN0063	Colombia:Pacifico, Choco:Quibdo	SRR28554034	2014	This study
L. guyanensis	MHOM/CO/2013/UN0043	Colombia:Pacifico, Nariño:Barbacoas	SRR28554032	2013	This study
L. guyanensis	MHOM/CO/2013/UN0049	Colombia:Pacifico, Nariño:Tumaco	SRR28554031	2013	This study
L. guyanensis	204-365	Guyana Francesa	SRR8179913	2004	Batra et al., 2018
L. guyanensis	S8104	Venezuela:Merida	ERR6188759	2018	Patiño et al 2022
L. guyanensis	MHOM/CO/08/LL0303	Colombia:Amazonia, Putumayo:Puerto Asis	SRR28554028	2008	This study
L. guyanensis	MHOM/CO/2018/UN0005	Colombia:Andina, Tolima:Rovira	SRR28554027	2018	This study
L. guyanensis x L. braziliensis	MHOM/CR/2020/StPierre	Costa Rica	SRR21604774	2020
L. infantum/mexicana	MHOM/CO/04/LL0087	Colombia:Andina, Santander:San Vicente de Chucurí	SRR28554025	2004	This study
L. lainsoni	MHOM/BR/1981/M6426	Brazil	SRR1657912	1981	Harkins et al 2016
L. lainsoni	216-34	Peru	SRR8179821	2016
L. mexicana	MNYC/BZ/62/M379	Brazil	ERR2212313	1962
L. naiffi	MDAS/BR/1979/M5533	Brazil	SRR1657911	1979	Harkins et al 2016
L. naiffi	MCAN/CO/1986/CL-223	Colombia	ERR205764	1986	Coughlan et al 2018
L. naiffi	HOMI-81	Colombia:Orinoquia, Guaviare	ERR6188758	2018	Patiño et al 2022
L. panamensis	LpBON83	Colombia:Andina, Antioquia	ERR3648452	NA	Patiño et al., 2020
L. panamensis	LpS7694	Colombia:Andina, Antioquia	ERR3648454	NA	Patiño et al., 2020
L. panamensis	LpS7842	Colombia:Andina, Antioquia	ERR3648456	NA	Patiño et al., 2020
L. panamensis	LpS8049	Colombia:Andina, Antioquia	ERR3648459	NA	Patiño et al., 2020
L. panamensis	LpS8056	Colombia:Andina, Antioquia	ERR3648460	NA	Patiño et al., 2020
L. panamensis	LpS8072	Colombia:Andina, Antioquia	ERR3648462	NA	Patiño et al., 2020
L. panamensis	LpS8087	Colombia:Andina, Antioquia	ERR3648463	NA	Patiño et al., 2020
L. panamensis	LpS8092	Colombia:Andina, Antioquia	ERR3648464	NA	Patiño et al., 2020
L. panamensis	LpS8117	Colombia:Andina, Antioquia	ERR3648466	NA	Patiño et al., 2020
L. panamensis	LpS8136	Colombia:Andina, Antioquia	ERR3648469	NA	Patiño et al., 2020
L. panamensis	W7056	Colombia:Andina, Antioquia:Uraba	SRR28554016	2012	This study
L. panamensis	W7058	Colombia:Andina, Antioquia:Segovia	SRR28554015	2012	This study
L. panamensis	W8169	Colombia:Andina, Antioquia:Nariño	SRR28554012	2018	This study
L. panamensis	W8194	Colombia:Andina, Antioquia:San Luis	SRR28554010	2019	This study
L. panamensis	W8215	Colombia:Andina, Antioquia:Taraza	SRR28554009	2019	This study
L. panamensis	W8232	Colombia:Andina, Antioquia:Yarumal	SRR28554008	2019	This study
L. panamensis	MHOM/87/CO/UA1114	Colombia:Andina, Antioquia	SRR7536442	1997	Urrea et al 2018
L. panamensis	MHOM/87/CO/UA140	Colombia:Andina, Antioquia	SRR7536449	1997	Urrea et al 2018
L. panamensis	MHOM/87/CO/UA1511	Colombia:Andina, Antioquia	SRR7536441	1997	Urrea et al 2018
L. panamensis	MHOM/87/CO/UA946	Colombia:Andina, Antioquia	SRR7536444	1997	Urrea et al 2018
L. panamensis	W6958	Colombia:Andina, Antioquia:Caceres	SRR28554018	NA	This study
L. panamensis	W8242	Colombia:Andina, Antioquia:Dabeiba	SRR28554007	2019	This study
L. panamensis	W8244	Colombia:Andina, Antioquia:San Luis	SRR28554006	2019	This study
L. panamensis	MHOM/CO/12/LL0490	Colombia:Andina, Antioquia:El bagre	SRR28554005	2012	This study
L. panamensis	MHOM/CO/05/LL0112	Colombia:Andina, Boyaca:Otanche	SRR28554020	2005	This study
L. panamensis	MHOM/CO/07/LL0245	Colombia:Andina, Boyaca:Puerto Boyaca	SRR28554021	2007	This study
L. panamensis	LpS8061	Colombia:Andina, Santander	ERR3648461	NA	Patiño et al., 2020
L. panamensis	MHOM/CO/12/LL0536	Colombia:Andina, Tolima:Mariquita	SRR28554019	2012	This study
L. panamensis	LpS8109	Colombia:Caribe, Bolivar:Santa Rosa del Sur	ERR3648465	NA	Patiño et al., 2020
L. panamensis	W8109	Colombia:Caribe, Bolivar:Santa Rosa del Sur	SRR28554013	2018	This study
L. panamensis	W7046	Colombia:Caribe, Cordoba:Tierra alta	SRR28554017	NA	This study
L. panamensis	LpBON94	Colombia:Pacifico, Cauca	ERR3648453	NA	Patiño et al., 2020
L. panamensis	MHOM/COL/81/L13	Colombia:Pacifico, Cauca:Cali	SRR547644	1981	Warren et al., 2021
L. panamensis	LpS8036	Colombia:Pacifico, Choco	ERR3648457	NA	Patiño et al., 2020
L. panamensis	LpS8124	Colombia:Pacifico, Choco	ERR3648467	NA	Patiño et al., 2020
L. panamensis	LpS8131	Colombia:Pacifico, Choco	ERR3648468	NA	Patiño et al., 2020
L. panamensis	W8046	Colombia:Pacifico, Choco:Tadi	SRR28554014	2018	This study
L. panamensis	W8104	Colombia:Pacifico, Choco:Acandi	SRR28554024	2018	This study
L. panamensis	W8134	Colombia:Pacifico, Choco:Bajo Baudo	SRR28554023	2018	This study
L. panamensis	MHOM/PA/94/PSC-1	Panama	SRR10246840	1994	Restrepo et al., 2011
L. panamensis	MHOM/PA/74/WR120	Panama	SRR1662198	1974	Harkins et al 2016
L. panamensis	BD-02	Panama:Bocas del Toro	SRR10246848	2018	Restrepo et al., 2011
L. panamensis	P14	Panama:Cocle	SRR20302776	2021	Llanes et al., 2022
L. panamensis	P39	Panama:Colon	SRR20302779	2021	Llanes et al., 2022
L. panamensis	P23	Panama:Darien	SRR20302772	2021	Llanes et al., 2022
L. panamensis	P38	Panama:Darien	SRR20302780	2021	Llanes et al., 2022
L. panamensis	P05	Panama:Panama	SRR20302792	2021	Llanes et al., 2022
L. panamensis	P17	Panama:Panama	SRR20302773	2021	Llanes et al., 2022
L. panamensis	P29	Panama:Panama	SRR20302790	2021	Llanes et al., 2022
L. panamensis	P02	Panama:West Panama	SRR20302793	2021	Llanes et al., 2022
L. panamensis	P10	Panama:West Panama	SRR20302781	2021	Llanes et al., 2022
L. panamensis	P12	Panama:West Panama	SRR20302778	2021	Llanes et al., 2022
L. panamensis	P13	Panama:West Panama	SRR20302777	2021	Llanes et al., 2022
L. panamensis	P15	Panama:West Panama	SRR20302775	2021	Llanes et al., 2022
L. panamensis	P16	Panama:West Panama	SRR20302774	2021	Llanes et al., 2022
L. panamensis	P28	Panama:West Panama	SRR20302791	2021	Llanes et al., 2022
L. panamensis	P30	Panama:West Panama	SRR20302789	2021	Llanes et al., 2022
L. panamensis	P31	Panama:West Panama	SRR20302788	2021	Llanes et al., 2022
L. panamensis	P32	Panama:West Panama	SRR20302787	2021	Llanes et al., 2022
L. panamensis	P33	Panama:West Panama	SRR20302786	2021	Llanes et al., 2022
L. panamensis	P34	Panama:West Panama	SRR20302785	2021	Llanes et al., 2022
L. panamensis	P35	Panama:West Panama	SRR20302784	2021	Llanes et al., 2022
L. panamensis	P36	Panama:West Panama	SRR20302783	2021	Llanes et al., 2022
L. panamensis	P37	Panama:West Panama	SRR20302782	2021	Llanes et al., 2022
L. panamensis	RG-01	Panama:West Panama	SRR10246849	2018	Restrepo et al., 2011
L. peruviana	MHOM/PE/1984/LC39	Peru	ERR599202	1984	Valdivia et al 2015
L. peruviana	MHOM/PE/03/LH2439(PER126)	Peru	ERR662615	2003	Van den Broeck et al., 2020
L. peruviana	PAB-4377	Peru	ERR599203	1988	Valdivia et al 2015
L. peruviana	MHOM/PE/84/LC26cl6	Peru:Anchash	ERR662616	1984	Van den Broeck et al., 2020
L. peruviana	MHOM/PE/88/LC272	Peru:Anchash	ERR662612	1988	Van den Broeck et al., 2020
L. peruviana	MHOM/PE/90/LC436	Peru:Anchash	ERR662613	1990	Van den Broeck et al., 2020
L. peruviana	MHOM/PE/90/LC443	Peru:Anchash	ERR662614	1990	Van den Broeck et al., 2020
L. peruviana	MHOM/PE/90/LC468	Peru:Anchash	ERR662619	1990	Van den Broeck et al., 2020
L. peruviana	MHOM/PE/89/LH741	Peru:Anchash	ERR662622	1989	Van den Broeck et al., 2020
L. peruviana	IAYA/PE/90/La36	Peru:Ayacucho	ERR662629	1990	Van den Broeck et al., 2020
L. peruviana	MHOM/PE/90/LCA08	Peru:Ayacucho	ERR662627	1990	Van den Broeck et al., 2020
L. peruviana	MHOM/PE/90/LCA09	Peru:Ayacucho	ERR662628	1990	Van den Broeck et al., 2020
L. peruviana	MHOM/PE/01/LH2161(PER001)	Peru:Ayacucho	ERR662610	2001	Van den Broeck et al., 2020
L. peruviana	MHOM/PE/90/LH249	Peru:Ayacucho	ERR662618	1990	Van den Broeck et al., 2020
L. peruviana	MHOM/PE/94/LC2434	Peru:Huanuco	ERR3150818	1994	Van den Broeck et al., 2020
L. peruviana	MCAN/PE/76/D8(LV608)	Peru:Lima	ERR662631	1976	Van den Broeck et al., 2020
L. peruviana	MHOM/PE/91/LC1015	Peru:Lima	ERR662630	1991	Van den Broeck et al., 2020
L. peruviana	MHOM/PE/85/LC106cl6	Peru:Lima	ERR662617	1985	Van den Broeck et al., 2020
L. peruviana	MHOM/PE/02/LH2355(PER087)	Peru:Lima	ERR662611	2002	Van den Broeck et al., 2020
L. peruviana	MHOM/PE/89/LH696	Peru:Lima	ERR662621	1989	Van den Broeck et al., 2020
L. peruviana	MHOM/PE/90/LH827	Peru:Lima	ERR662623	1990	Van den Broeck et al., 2020
L. peruviana	MHOM/PE/90/LH925	Peru:Lima	ERR662624	1990	Van den Broeck et al., 2020
L. peruviana	MHOM/PE/90/HB22	Peru:Piura	ERR662602	1990	Van den Broeck et al., 2020
L. peruviana	MHOM/PE/90/HB31	Peru:Piura	ERR662603	1990	Van den Broeck et al., 2020
L. peruviana	MHOM/PE/90/HB44	Peru:Piura	ERR662604	1990	Van den Broeck et al., 2020
L. peruviana	MHOM/PE/90/HB55	Peru:Piura	ERR662605	1990	Van den Broeck et al., 2020
L. peruviana	MHOM/PE/90/HB56	Peru:Piura	ERR662606	1990	Van den Broeck et al., 2020
L. peruviana	MHOM/PE/90/HB67	Peru:Piura	ERR662607	1990	Van den Broeck et al., 2020
L. peruviana	MHOM/PE/90/HB83	Peru:Piura	ERR662608	1990	Van den Broeck et al., 2020
L. peruviana	MHOM/PE/90/HB86	Peru:Piura	ERR662609	1990	Van den Broeck et al., 2020
L. peruviana	MHOM/PE/89/LC900	Peru:Piura	ERR662620	1989	Van den Broeck et al., 2020
L. shawi	MCEB/BR/1984/M8408	Brazil:Serra dos Carajás - Pará State	SRR1657909	1984	Harkins et al 2016

## Sheet: SupplTable3
Species	Strain	Mapping Rate	Production (Gbp)	Genotyped SNP	Alternative Alleles	Heterozygotes	% Heterozygotes (Genotyped)	Genotyped SNP (fixed)	Heterozygotes (Fixed SNPs)	%Heterozygotes (Fixed SNPs)	Population K2	Population K4	Population K10
L. braziliensis x L. peruviana	HR410	89.76%	2023-01-01	1743158	107651	68311	0.0391881	213459	3	1.40542e-05	Pop1	Admixed Pop1 and Pop2	Admixed
L. braziliensis x L. peruviana	HR80	88.28%	2023-01-01	1742916	107594	68331	0.039205	213440	4	1.87406e-05	Pop1	Admixed Pop1 and Pop2	Admixed
L. panamensis	L13	81.81%	4	1731183	312439	7057	0.0040764	211605	24	0.000113419	Pop2	Admixed Pop3 and Pop4	Admixed
L. braziliensis	Lb7616	94.05%	2023-07-05	1427455	96099	9504	0.006658	172878	954	0.00551834	Admixed	Admixed Pop2 and Pop3	Admixed
L. braziliensis	Lb7864	94.48%	2023-07-04	757081	58895	2886	0.00381201	96056	69	0.000718331	Admixed	Admixed Pop2 and Pop3	Admixed
L. braziliensis x L. peruviana	LC1407	93.22%	2023-09-02	1748141	109599	70340	0.040237	213799	1	4.67729e-06	Pop1	Admixed Pop1 and Pop2	Admixed
L. braziliensis x L. peruviana	LC1408	91.54%	2023-05-03	1748558	109543	70054	0.0400639	213816	1	4.67692e-06	Pop1	Admixed Pop1 and Pop2	Admixed
L. braziliensis x L. peruviana	LC1418	92.38%	2023-02-03	1748526	109543	70039	0.040056	213819	0	0	Pop1	Admixed Pop1 and Pop2	Admixed
L. braziliensis x L. peruviana	LC1419	92.15%	2023-01-04	1748873	109988	70698	0.0404249	213828	1	4.67666e-06	Pop1	Admixed Pop1 and Pop2	Admixed
L. braziliensis x L. peruviana	LC2435	90.82%	2023-05-01	1746329	108733	69187	0.0396185	213676	1	4.67998e-06	Pop1	Admixed Pop1 and Pop2	Admixed
L. braziliensis x L. peruviana	LC2520	90.67%	2023-03-01	1745587	106976	66204	0.0379265	213631	3	1.40429e-05	Pop1	Admixed Pop1 and Pop2	Admixed
L. braziliensis x L. peruviana	LC2851	89.61%	2023-01-01	1742686	106016	65764	0.0377371	213397	4	1.87444e-05	Pop1	Admixed Pop1 and Pop2	Admixed
L. braziliensis x L. peruviana	LC2877	88.51%	1	1741745	106861	67329	0.0386561	213346	5	2.34361e-05	Pop1	Admixed Pop1 and Pop2	Admixed
L. braziliensis x L. peruviana	LH1099	93.07%	2023-03-03	1748565	109691	70338	0.0402261	213815	1	4.67694e-06	Pop1	Admixed Pop1 and Pop2	Admixed
L. guyanensis	LL0725	89.90%	2023-03-03	1735007	430525	251875	0.145172	210996	94079	0.44588	Admixed	Admixed Pop2, Pop3 and Pop4	Admixed
L. panamensis	LpS8036	88.04%	2023-07-04	1747743	324483	11054	0.00632473	213719	2	9.35808e-06	Pop2	Pop4	Admixed
L. panamensis	LpS8072	91.08%	2023-04-04	1747126	324211	10864	0.00621821	213681	2	9.35975e-06	Pop2	Pop4	Admixed
L. panamensis	LpS8092	85.63%	2023-07-04	1748032	324577	11079	0.00633798	213753	0	0	Pop2	Pop4	Admixed
L. panamensis	LpS8131	78.12%	2023-03-04	1745183	320597	6775	0.00388211	213488	1	4.6841e-06	Pop2	Pop4	Admixed
L. braziliensis	M2903*	94.23%	0.99	1729212	62624	33171	0.0191827	212183	216	0.00101799	Pop1	Pop2	Admixed
L. braziliensis x L. peruviana	PER011	76.98%	2023-04-02	1744683	106593	67786	0.0388529	213768	0	0	Pop1	Admixed Pop1 and Pop2	Admixed
L. guyanensis x L. braziliensis	StPierre	88.95%	2023-06-03	1743951	375292	312461	0.179168	212257	187649	0.884065	Admixed	Admixed Pop2, Pop3 and Pop4	Admixed
L. guyanensis	UN0005	90.60%	2023-03-03	1739188	315413	7418	0.00426521	212822	16	7.51802e-05	Pop2	Admixed Pop3 and Pop4	Admixed
L. panamensis	W7056	69.48%	2023-05-03	1710962	425537	119060	0.0695866	211674	2009	0.00949101	Pop2	Pop4	Admixed
L. panamensis	W8046	89.22%	2023-02-03	1740041	319961	7227	0.00415335	212883	2	9.39483e-06	Pop2	Pop4	Admixed
L. panamensis	W8242	77.33%	2023-04-03	1708715	361858	53320	0.0312047	211652	119	0.000562244	Admixed	Admixed	Admixed
L. braziliensis	W8252	87.80%	2023-05-03	1719261	351715	317544	0.184698	204404	199622	0.976605	Admixed	Admixed Pop2 and Pop4	Admixed
L. panamensis	BD-02	87.81%	2023-08-02	1743572	319532	8009	0.00459344	213168	14	6.56759e-05	Pop2	Pop4	Admixed
L. lainsoni	216-34	39.78%	2023-08-06	1276102	339143	6286	0.00492594	NA	NA	NA	NA	NA	NA
L. naiffi	CL-223	80.38%	2023-06-01	1636287	628705	19174	0.011718	NA	NA	NA	NA	NA	NA
L. naiffi	HOMI-81	74.40%	2023-06-05	1704539	667734	26690	0.0156582	NA	NA	NA	NA	NA	NA
L. infantum/mexicana	LL0087	5.91%	2.0	262207	192488	271	0.00103353	NA	NA	NA	NA	NA	NA
L. panamensis	LL0490	9.60%	2023-02-02	460215	197138	57495	0.124931	NA	NA	NA	NA	NA	NA
L. mexicana	M379	7.79%	2023-06-02	293093	197156	270	0.000921209	NA	NA	NA	NA	NA	NA
L. naiffi	M5533	72.52%	2023-09-01	1674912	668930	18668	0.0111457	NA	NA	NA	NA	NA	NA
L. lainsoni	M6426	55.67%	0.91	1483380	390659	4567	0.00307878	NA	NA	NA	NA	NA	NA
L. shawi	M8408	78.48%	1	1707642	293334	6497	0.00380466	NA	NA	NA	NA	NA	NA
L. panamensis	W8134	32.15%	2023-05-03	1680433	513624	218299	0.129906	NA	NA	NA	NA	NA	NA
L. panamensis	W8169	7.00%	2023-06-03	305227	212831	1657	0.00542875	NA	NA	NA	NA	NA	NA
L. peruviana	D8A1	92.07%	2023-04-02	1746543	77308	3969	0.00227249	213719	1	4.67904e-06	Pop1	Pop1	Pop1
L. peruviana	HB22A1	86.36%	2023-06-03	1747257	79213	4560	0.0026098	213697	0	0	Pop1	Pop1	Pop1
L. peruviana	HB31A1	83.62%	3	1746504	78948	4389	0.00251302	213660	1	4.68033e-06	Pop1	Pop1	Pop1
L. peruviana	HB44A1	86.57%	4	1747683	79297	4964	0.00284033	213742	2	9.35708e-06	Pop1	Pop1	Pop1
L. peruviana	HB55A1	92.21%	2023-05-03	1746942	79244	4669	0.00267267	213668	1	4.68016e-06	Pop1	Pop1	Pop1
L. peruviana	HB56A1	87.35%	2023-03-03	1746934	79193	4924	0.00281865	213690	3	1.4039e-05	Pop1	Pop1	Pop1
L. peruviana	HB67A1	80.05%	2023-07-02	1745390	78638	4185	0.00239774	213577	1	4.68215e-06	Pop1	Pop1	Pop1
L. peruviana	HB83A1	85.91%	2023-01-03	1746917	78548	4031	0.00230749	213719	2	9.35808e-06	Pop1	Pop1	Pop1
L. peruviana	HB86A1	90.32%	2023-01-03	1747115	78964	4737	0.00271133	213723	2	9.35791e-06	Pop1	Pop1	Pop1
L. peruviana	La36A1	92.98%	2023-03-03	1747452	77726	4067	0.00232739	213758	0	0	Pop1	Pop1	Pop1
L. peruviana	LC1015A1	92.48%	2023-04-02	1745581	77067	3633	0.00208126	213635	0	0	Pop1	Pop1	Pop1
L. peruviana	LC106cl6A1	88.87%	2023-05-03	1747675	77722	4145	0.00237172	213758	0	0	Pop1	Pop1	Pop1
L. peruviana	LC2434A1	90.47%	1	1738435	77344	3064	0.0017625	212885	4	1.87895e-05	Pop1	Pop1	Pop1
L. peruviana	LC26cl6A1	92.59%	3	1747111	78859	7254	0.004152	213718	0	0	Pop1	Pop1	Pop1
L. peruviana	LC272A1	89.48%	2023-07-03	1747819	80555	10140	0.00580152	213752	0	0	Pop1	Pop1	Pop1
L. peruviana	LC436A1	91.27%	2023-06-04	1748050	79631	8287	0.00474071	213763	0	0	Pop1	Pop1	Pop1
L. peruviana	LC443A1	89.94%	2023-01-03	1747198	79531	8541	0.0048884	213728	1	4.67884e-06	Pop1	Pop1	Pop1
L. peruviana	LC468A1	90.77%	2023-06-03	1747689	78414	6407	0.00366598	213751	2	9.35668e-06	Pop1	Pop1	Pop1
L. peruviana	LC900A1	87.43%	2023-06-03	1746802	79068	4453	0.00254923	213667	2	9.36036e-06	Pop1	Pop1	Pop1
L. peruviana	LCA08A1	94.13%	2023-05-03	1747799	77858	4224	0.00241675	213767	2	9.35598e-06	Pop1	Pop1	Pop1
L. peruviana	LCA09A1	93.75%	2023-07-03	1747955	77826	4198	0.00240166	213785	0	0	Pop1	Pop1	Pop1
L. peruviana	LEM1537	90.98%	2023-09-01	1448756	64675	3187	0.00219982	185107	4	2.16091e-05	Pop1	Pop1	Pop1
L. peruviana	LH2161A1	90.60%	2023-06-03	1747858	77781	4160	0.00238006	213756	1	4.67823e-06	Pop1	Pop1	Pop1
L. peruviana	LH2355A1	91.74%	2023-02-04	1747357	77325	4476	0.00256158	213711	3	1.40376e-05	Pop1	Pop1	Pop1
L. peruviana	LH2439A1	92.79%	2023-03-03	1747721	77667	4043	0.0023133	213783	2	9.35528e-06	Pop1	Pop1	Pop1
L. peruviana	LH249A1	91.74%	2023-02-03	1747356	77615	4064	0.0023258	213752	1	4.67832e-06	Pop1	Pop1	Pop1
L. peruviana	LH696A1	90.90%	2023-03-03	1747639	77600	4116	0.00235518	213774	1	4.67784e-06	Pop1	Pop1	Pop1
L. peruviana	LH741A1	88.72%	2023-09-02	1746579	76055	4001	0.00229076	213693	2	9.35922e-06	Pop1	Pop1	Pop1
L. peruviana	LH827A1	89.53%	2023-02-03	1747082	78088	6433	0.00368214	213741	3	1.40357e-05	Pop1	Pop1	Pop1
L. peruviana	LH925A1	89.86%	2023-08-02	1746988	77367	3894	0.00222898	213744	0	0	Pop1	Pop1	Pop1
L. peruviana	PAB-4377	84.37%	2023-03-03	1622611	70534	2432	0.00149882	202729	6	2.95962e-05	Pop1	Pop1	Pop1
L. panamensis	P02	85.29%	2023-08-04	1748197	322796	7536	0.00431073	213772	3	1.40336e-05	Pop2	Pop4	Pop10
L. panamensis	P05	84.53%	2023-07-03	1747645	323343	9112	0.00521387	213716	3	1.40373e-05	Pop2	Pop4	Pop10
L. panamensis	P10	82.76%	2023-02-04	1747882	322705	7629	0.00436471	213745	0	0	Pop2	Pop4	Pop10
L. panamensis	P12	83.23%	2023-09-03	1747583	323463	9055	0.00518144	213750	1	4.67836e-06	Pop2	Pop4	Pop10
L. panamensis	P13	84.84%	2023-07-04	1748050	322768	8110	0.00463946	213792	1	4.67744e-06	Pop2	Pop4	Pop10
L. panamensis	P14	82.69%	2023-06-04	1747855	323084	8701	0.0049781	213776	4	1.87112e-05	Pop2	Pop4	Pop10
L. panamensis	P15	84.43%	2023-09-03	1747677	322316	6985	0.00399673	213734	0	0	Pop2	Pop4	Pop10
L. panamensis	P16	82.90%	2023-09-03	1747745	322608	7651	0.00437764	213721	1	4.679e-06	Pop2	Pop4	Pop10
L. panamensis	P17	83.91%	2023-08-04	1748458	322843	7568	0.00432839	213778	2	9.3555e-06	Pop2	Pop4	Pop10
L. panamensis	P23	83.72%	2023-06-04	1748276	321862	9810	0.00561124	213771	38	0.00017776	Pop2	Pop4	Pop10
L. panamensis	P28	84.24%	4	1747750	323676	9429	0.00539494	213745	7	3.27493e-05	Pop2	Pop4	Pop10
L. panamensis	P29	84.30%	2023-01-05	1748231	323168	8037	0.00459722	213761	0	0	Pop2	Pop4	Pop10
L. panamensis	P30	85.25%	2023-01-04	1747845	322949	8081	0.00462341	213742	2	9.35708e-06	Pop2	Pop4	Pop10
L. panamensis	P31	83.86%	2023-05-05	1748577	323325	8273	0.00473128	213790	5	2.33874e-05	Pop2	Pop4	Pop10
L. panamensis	P32	84.87%	2023-04-04	1747953	323661	9215	0.00527188	213760	1	4.67814e-06	Pop2	Pop4	Pop10
L. panamensis	P33	83.78%	2023-05-04	1748040	323345	8672	0.00496098	213761	0	0	Pop2	Pop4	Pop10
L. panamensis	P34	84.43%	2023-07-03	1747590	322989	8289	0.0047431	213740	5	2.33929e-05	Pop2	Pop4	Pop10
L. panamensis	P35	85.93%	2023-02-04	1748024	323451	8739	0.00499936	213755	4	1.8713e-05	Pop2	Pop4	Pop10
L. panamensis	P36	85.12%	2023-03-03	1747180	322512	7507	0.00429664	213698	1	4.6795e-06	Pop2	Pop4	Pop10
L. panamensis	P37	85.41%	2023-09-05	1748647	323847	9156	0.00523605	213800	2	9.35454e-06	Pop2	Pop4	Pop10
L. panamensis	P38	84.20%	2023-08-03	1747450	322995	8099	0.00463475	213743	3	1.40355e-05	Pop2	Pop4	Pop10
L. panamensis	P39	83.74%	4	1747872	323585	9247	0.00529043	213753	2	9.35659e-06	Pop2	Pop4	Pop10
L. panamensis	PSC-1	83.19%	2023-08-02	1741571	320892	7964	0.00457288	212902	9	4.2273e-05	Pop2	Pop4	Pop10
L. panamensis	RG-01	87.53%	2023-08-02	1743409	321786	8274	0.00474587	213092	13	6.10065e-05	Pop2	Pop4	Pop10
L. panamensis	UA140	87.45%	2023-08-02	1737463	320567	8534	0.00491176	NA	NA	NA	Pop3	Pop5	Pop10
L. panamensis	WR120	85.85%	0.89	1704617	311963	6863	0.00402612	208389	15	7.19808e-05	Pop2	Pop4	Pop10
L. braziliensis	CUM29A1	86.48%	2023-06-02	1746428	90869	44341	0.0253895	213757	75	0.000350866	Pop1	Pop2	Pop3
L. braziliensis	Lb7933	91.02%	2023-09-04	1748654	91681	43283	0.0247522	213737	56	0.000262004	Pop1	Pop2	Pop3
L. braziliensis	LC1409A1	92.15%	2023-06-01	1744295	96053	47475	0.0272173	213558	7	3.2778e-05	Pop1	Pop2	Pop3
L. braziliensis	LC1565A1	91.22%	2023-05-01	1744188	91131	43485	0.0249314	213562	70	0.000327774	Pop1	Pop2	Pop3
L. braziliensis	LC2452A1	89.69%	2023-02-01	1744045	93561	48517	0.0278187	213489	57	0.000266993	Pop1	Pop2	Pop3
L. braziliensis	LC2551A1	88.43%	2023-02-01	1743295	95118	46433	0.0266352	213437	5	2.34261e-05	Pop1	Pop2	Pop3
L. braziliensis	LC2873A1	89.13%	2023-03-01	1744478	93114	44796	0.0256787	213494	30	0.000140519	Pop1	Pop2	Pop3
L. braziliensis	LH825B2	90.30%	2023-01-01	1743273	92763	45025	0.0258279	213439	49	0.000229574	Pop1	Pop2	Pop3
L. braziliensis	PER002A1	84.55%	2023-04-02	1746585	92826	46685	0.0267293	213719	55	0.000257347	Pop1	Pop2	Pop3
L. braziliensis	PER005A1	86.45%	2	1745678	94168	47909	0.0274444	213677	51	0.000238678	Pop1	Pop2	Pop3
L. braziliensis	PER010A1	90.27%	2023-07-02	1747027	92084	43237	0.0247489	213768	31	0.000145017	Pop1	Pop2	Pop3
L. braziliensis	PER012A1	80.41%	2023-05-02	1746333	91897	42880	0.0245543	213714	29	0.000135695	Pop1	Pop2	Pop3
L. braziliensis	PER014A1	85.67%	2023-07-02	1747334	94255	49003	0.0280444	213757	53	0.000247945	Pop1	Pop2	Pop3
L. braziliensis	PER016A1	81.55%	2023-02-05	1748530	95722	48588	0.0277879	213809	61	0.000285301	Pop1	Pop2	Pop3
L. braziliensis	PER065A1	78.42%	2023-08-02	1746657	94870	50471	0.0288958	213740	82	0.000383644	Pop1	Pop2	Pop3
L. braziliensis	PER069A1	84.87%	2023-01-02	1745471	93012	47220	0.0270529	213656	61	0.000285506	Pop1	Pop2	Pop3
L. braziliensis	PER086A1	79.44%	2023-07-02	1746502	93932	45303	0.0259393	213711	44	0.000205886	Pop1	Pop2	Pop3
L. braziliensis	PER094A1	80.26%	2023-08-03	1747719	94609	46310	0.0264974	213757	35	0.000163737	Pop1	Pop2	Pop3
L. braziliensis	PER201A1	87.22%	2023-04-02	1746798	92656	46317	0.0265154	213741	98	0.000458499	Pop1	Pop2	Pop3
L. braziliensis	PER215A1	85.54%	2023-05-02	1746663	95150	47911	0.02743	213725	45	0.000210551	Pop1	Pop2	Pop3
L. braziliensis	PER260A1	82.57%	2023-06-02	1746907	94767	50235	0.0287565	213734	65	0.000304116	Pop1	Pop2	Pop3
L. braziliensis	Lb7529	91.70%	2023-02-04	1747542	97943	52923	0.0302843	213635	44	0.000205959	Pop1	Pop2	Pop4
L. braziliensis	LL0230	93.19%	2023-04-03	1743899	96592	50660	0.0290498	213381	43	0.000201517	Pop1	Pop2	Pop4
L. braziliensis	LL0384	92.84%	2023-04-02	1737831	95668	50893	0.0292854	212798	55	0.000258461	Pop1	Pop2	Pop4
L. braziliensis	UN0002A	92.38%	2023-05-03	1743321	96291	50685	0.0290738	213290	47	0.000220357	Pop1	Pop2	Pop4
L. braziliensis	UN0002B	91.64%	2023-04-03	1742460	96189	50605	0.0290423	213193	45	0.000211076	Pop1	Pop2	Pop4
L. braziliensis	UN0007	93.06%	2023-04-03	1743060	94251	47786	0.027415	213263	47	0.000220385	Pop1	Pop2	Pop4
L. braziliensis	UN0008	92.08%	2023-03-03	1742138	97073	51084	0.0293226	213228	34	0.000159454	Pop1	Pop2	Pop4
L. braziliensis	UN0009	92.29%	2023-04-03	1742008	96752	50914	0.0292272	213187	36	0.000168866	Pop1	Pop2	Pop4
L. braziliensis	UN0010	91.19%	2023-04-03	1740254	96021	50163	0.0288251	212948	45	0.000211319	Pop1	Pop2	Pop4
L. braziliensis	UN0011	93.39%	2023-05-03	1742837	96987	51277	0.0294216	213235	31	0.00014538	Pop1	Pop2	Pop4
L. braziliensis	UN0018	92.40%	2023-05-03	1742054	96933	51756	0.0297098	213161	47	0.000220491	Pop1	Pop2	Pop4
L. braziliensis	UN0023	93.12%	2023-03-03	1740677	93943	48539	0.0278851	213019	70	0.000328609	Pop1	Pop2	Pop4
L. braziliensis	UN0026	92.35%	2023-06-03	1743884	96728	51065	0.0292823	213365	25	0.00011717	Pop1	Pop2	Pop4
L. braziliensis	UN0028	92.97%	2023-04-03	1742217	96527	50669	0.0290831	213206	44	0.000206373	Pop1	Pop2	Pop4
L. braziliensis	UN0036A	93.20%	2023-04-03	1742377	98448	52951	0.0303901	213198	19	8.9119e-05	Pop1	Pop2	Pop4
L. braziliensis	UN0036M	92.57%	2023-03-03	1742742	98500	52928	0.0303705	213205	19	8.91161e-05	Pop1	Pop2	Pop4
L. braziliensis	UN0040	92.46%	2023-04-03	1742790	93990	48155	0.027631	213247	72	0.000337637	Pop1	Pop2	Pop4
L. braziliensis	UN0041	92.35%	2023-05-03	1743579	98664	54107	0.0310321	213302	32	0.000150022	Pop1	Pop2	Pop4
L. braziliensis	UN0042	91.29%	2023-04-03	1741212	98382	53904	0.0309577	213095	30	0.000140782	Pop1	Pop2	Pop4
L. braziliensis	UN0044	90.30%	2023-04-03	1743437	96263	49747	0.0285339	213335	31	0.000145311	Pop1	Pop2	Pop4
L. braziliensis	UN0045	91.87%	2023-04-03	1743017	96262	50441	0.0289389	213255	34	0.000159434	Pop1	Pop2	Pop4
L. braziliensis	UN0046	93.19%	2023-04-03	1743111	96140	50298	0.0288553	213239	43	0.000201652	Pop1	Pop2	Pop4
L. braziliensis	UN0048	91.73%	2023-05-03	1742848	96004	49908	0.0286359	213242	34	0.000159443	Pop1	Pop2	Pop4
L. braziliensis	UN0053	92.97%	2023-04-03	1743023	97130	51852	0.0297483	213239	49	0.000229789	Pop1	Pop2	Pop4
L. braziliensis	UN0057	91.35%	2023-05-03	1742826	94972	48392	0.0277664	213241	45	0.000211029	Pop1	Pop2	Pop4
L. braziliensis	UN0060	93.15%	2023-04-03	1742957	96638	51619	0.0296158	213252	45	0.000211018	Pop1	Pop2	Pop4
L. braziliensis	UN0061	87.28%	2023-03-03	1741136	95308	50851	0.0292056	213073	74	0.000347299	Pop1	Pop2	Pop4
L. braziliensis	UN0066	92.03%	2.0	1731396	94470	49134	0.0283783	212088	38	0.000179171	Pop1	Pop2	Pop4
L. braziliensis	Lb8102	91.01%	2023-02-04	1747439	94335	41637	0.0238274	213651	53	0.000248068	Pop1	Pop2	Pop5
L. braziliensis	LL0015	92.52%	2023-02-03	1741904	94072	40522	0.0232631	213170	5	2.34555e-05	Pop1	Pop2	Pop5
L. braziliensis	LL0017	92.00%	2023-03-03	1741323	85763	23047	0.0132353	213091	11	5.16211e-05	Pop1	Pop2	Pop5
L. braziliensis	LL0235	91.32%	2023-03-02	1733944	80083	12832	0.00740047	212277	0	0	Pop1	Pop2	Pop5
L. braziliensis	LL0249	93.33%	2023-02-03	1738459	81573	15001	0.00862891	212686	0	0	Pop1	Pop2	Pop5
L. braziliensis	LL0301	92.38%	2023-05-03	1740667	110444	57922	0.0332758	213072	53	0.000248742	Pop1	Pop2	Pop5
L. braziliensis	UN0047	92.66%	2023-03-02	1732868	111223	53205	0.0307034	212153	349	0.00164504	Pop1	Pop2	Pop5
L. braziliensis	W8102	92.31%	2023-01-03	1742475	93451	40842	0.0234391	213236	46	0.000215723	Pop1	Pop2	Pop5
L. braziliensis	W8229	93.17%	2023-04-03	1738700	108106	41382	0.0238005	212750	295	0.0013866	Pop1	Pop2	Pop5
L. braziliensis	M2904*	75.97%	4	1746752	20198	20189	0.011558	213588	972	0.00455082	Pop1	Pop2	Pop6
L. braziliensis	Z105	79.13%	0.63	1537516	49229	30520	0.0198502	191223	1	5.2295e-06	Pop1	Pop2	Pop6
L. braziliensis	Z106	66.88%	2023-03-02	1732868	66650	44660	0.0257723	212228	103	0.000485327	Pop1	Pop2	Pop6
L. braziliensis	Z26	70.93%	2023-04-01	1714283	68457	48419	0.0282445	210453	4	1.90066e-05	Pop1	Pop2	Pop6
L. braziliensis	Z27	79.49%	2023-03-01	1719482	69174	49016	0.0285063	210809	9	4.26927e-05	Pop1	Pop2	Pop6
L. braziliensis	Z45	78.90%	2	1735003	71832	51463	0.0296616	212438	15	7.06088e-05	Pop1	Pop2	Pop6
L. braziliensis	Z72	79.69%	2023-04-01	1706856	64457	1907	0.00111726	209187	97	0.0004637	Pop1	Pop2	Pop6
L. braziliensis	Z73	90.72%	0.51	1611955	53125	32325	0.0200533	199928	4	2.00072e-05	Pop1	Pop2	Pop6
L. braziliensis	Z74	73.91%	2023-06-01	1716429	64396	42640	0.0248423	210552	99	0.000470193	Pop1	Pop2	Pop6
L. braziliensis	Z75	81.51%	2023-01-02	1726032	66335	2209	0.00127981	211310	110	0.000520562	Pop1	Pop2	Pop6
L. braziliensis	Z78	77.65%	1	1669262	62030	41688	0.0249739	205844	1	4.85805e-06	Pop1	Pop2	Pop6
L. braziliensis	Lb8025	95.74%	2023-04-04	792477	48969	48410	0.0610869	100327	337	0.00335902	Pop1	Pop2	Pop6
L. guyanensis	204-365	66.07%	2023-05-03	1720793	324656	6632	0.00385404	208225	78	0.000374595	Pop2	Pop3	Pop7
L. guyanensis	LL0303	90.40%	2023-05-03	1739155	333508	8425	0.00484431	212860	17	7.98647e-05	Pop2	Pop3	Pop7
L. guyanensis	LL0715	88.58%	2023-05-03	1739880	335303	8199	0.00471239	212927	11	5.16609e-05	Pop2	Pop3	Pop7
L. guyanensis	LL0726	87.09%	2023-02-02	1728757	331876	7164	0.00414402	211581	7	3.30843e-05	Pop2	Pop3	Pop7
L. guyanensis	LL0729	88.55%	2023-05-03	1738920	334926	8057	0.00463334	212805	0	0	Pop2	Pop3	Pop7
L. guyanensis	M4147*	87.79%	2023-03-08	1747507	337115	11395	0.00652072	213617	89	0.000416634	Pop2	Pop3	Pop7
L. guyanensis	S8104	89.15%	2023-09-05	1744804	341548	7788	0.00446354	213412	24	0.000112459	Pop2	Pop3	Pop7
L. guyanensis	UN0003	90.24%	2023-04-03	1738211	334952	8161	0.00469506	212712	5	2.3506e-05	Pop2	Pop3	Pop7
L. panamensis	W8104	90.41%	2023-01-02	1729433	337067	6597	0.00381454	211568	4	1.89065e-05	Pop2	Pop4	Pop7
L. guyanensis	UN0043	89.81%	2023-03-03	1736190	324985	6113	0.00352093	212443	11	5.17786e-05	Pop2	Admixed Pop3 and Pop4	Pop8
L. guyanensis	UN0049	91.62%	2023-06-03	1739151	325812	6396	0.00367766	212802	10	4.6992e-05	Pop2	Admixed Pop3 and Pop4	Pop8
L. guyanensis	UN0063	90.15%	2023-02-03	1737355	322008	7363	0.00423805	212502	709	0.00333644	Pop2	Admixed Pop3 and Pop4	Pop8
L. panamensis	LL0112	89.65%	2023-03-03	1741598	321569	7025	0.00403365	213089	2	9.38575e-06	Pop2	Pop4	Pop9
L. braziliensis	LL0245	91.64%	2023-02-03	1741547	321629	6889	0.00395568	213126	1	4.69206e-06	Pop1	Pop2	Pop9
L. panamensis	LL0536	91.27%	2023-06-03	1742490	323937	11428	0.00655843	213227	4	1.87594e-05	Pop2	Pop4	Pop9
L. guyanensis	LL0772	88.86%	2.0	1728570	318284	6322	0.00365736	211443	0	0	Pop2	Pop4	Pop9
L. panamensis	LpBON83	91.48%	2023-01-04	1746685	324333	10885	0.0062318	213681	0	0	Pop2	Pop4	Pop9
L. panamensis	LpBON94	85.53%	2023-03-04	1747396	323401	8913	0.00510073	213711	3	1.40376e-05	Pop2	Pop4	Pop9
L. panamensis	LpS7694	87.73%	2023-04-04	1747272	322600	7351	0.00420713	213698	3	1.40385e-05	Pop2	Pop4	Pop9
L. panamensis	LpS7842	95.31%	2023-05-04	1138043	219967	6873	0.00603931	144366	3	2.07805e-05	Pop2	Pop4	Pop9
L. panamensis	LpS8049	75.31%	2023-08-04	1746231	322429	7574	0.00433734	213599	1	4.68167e-06	Pop2	Pop4	Pop9
L. panamensis	LpS8056	95.13%	2023-02-04	852669	163014	4616	0.00541359	107380	0	0	Pop2	Pop4	Pop9
L. panamensis	LpS8061	80.27%	2023-05-04	1746890	322174	7225	0.00413592	213684	3	1.40394e-05	Pop2	Pop4	Pop9
L. panamensis	LpS8087	83.62%	5.0	1747977	324466	10882	0.00622548	213740	3	1.40357e-05	Pop2	Pop4	Pop9
L. panamensis	LpS8109	68.00%	2023-01-04	1747106	323728	10257	0.00587085	213691	1	4.67965e-06	Pop2	Pop4	Pop9
L. panamensis	LpS8117	83.99%	2023-02-04	1745374	324006	10825	0.00620211	213489	0	0	Pop2	Pop4	Pop9
L. panamensis	LpS8124	95.61%	2023-02-04	1738667	320544	7002	0.00402722	212799	4	1.87971e-05	Pop2	Pop4	Pop9
L. panamensis	LpS8136	83.92%	4.0	1745658	322409	7878	0.00451291	213512	3	1.40507e-05	Pop2	Pop4	Pop9
L. panamensis	UA1114	88.59%	2023-08-02	1739062	321010	8630	0.00496245	NA	NA	NA	Pop2	Pop4	Pop9
L. panamensis	UA1511	91.07%	2023-05-04	1744054	322699	9446	0.00541612	NA	NA	NA	Pop2	Pop4	Pop9
L. panamensis	W6958	90.08%	2023-02-03	1741093	322151	8570	0.0049222	213083	6	2.8158e-05	Pop2	Pop4	Pop9
L. panamensis	W7046	89.53%	2023-05-03	1742502	322570	9033	0.00518393	213224	3	1.40697e-05	Pop2	Pop4	Pop9
L. panamensis	W7058	90.32%	2023-02-03	1740806	322928	10561	0.00606673	212958	7	3.28703e-05	Pop2	Pop4	Pop9
L. braziliensis	W7995	88.68%	2023-04-03	1741750	322363	8650	0.00496627	213083	4	1.8772e-05	Pop2	Pop4	Pop9
L. panamensis	W8109	89.51%	2023-04-03	1742356	323164	10437	0.00599017	213241	1	4.68953e-06	Pop2	Pop4	Pop9
L. panamensis	W8215	89.53%	2023-03-03	1740307	321605	7805	0.00448484	212948	2	9.39196e-06	Pop2	Pop4	Pop9
L. panamensis	W8232	89.59%	2023-03-03	1740181	321827	8363	0.00480582	212938	3	1.40886e-05	Pop2	Pop4	Pop9
L. panamensis	W8244	89.96%	2023-05-03	1741614	323552	11131	0.0063912	213159	5	2.34567e-05	Pop2	Pop4	Pop9
L. guyanensis	CL-085	64.73%	2023-01-03	1740999	321181	7858	0.0045135	212842	14	6.57765e-05	Pop2	Pop3	Pop9
L. guyanensis	LL0735	89.54%	2023-04-03	1741797	321571	7689	0.00441441	213161	5	2.34564e-05	Pop2	Pop3	Pop9
L. panamensis	UA946*	90.43%	2023-02-04	1745459	323041	9299	0.00532754	213362	18	8.43637e-05	Pop2	Pop4	Pop9
L. panamensis	W8194	89.54%	2023-09-02	1738426	322713	11021	0.00633964	212723	5	2.35047e-05	Pop2	Pop4	Pop9

## Sheet: SupplTable4
Species/Population 1	Species/Population 2	Mean Fst	Weighted Fst
L. braziliensis + L. peruviana	L. panamensis + L. guyanensis	0.37345	0.8501
L. peruviana Lper1	L. peruviana Lper2	0.36596	0.59785
L. peruviana	L. braziliensis	0.13215	0.40426
L. peruviana	L. braziliensis Lbra4	0.28718	0.56106
L. peruviana	L. braziliensis Lbra3	0.25593	0.53683
L. peruviana	L. braziliensis Lbra2	0.46435	0.66146
L. peruviana	L. braziliensis Lbra1	0.4162	0.68586
L. braziliensis Lbra3	L. braziliensis Lbra4	0.088938	0.1399
L. braziliensis Lbra3	L. braziliensis Lbra1	0.20328	0.35665
L. braziliensis Lbra2	L. braziliensis Lbra4	0.18124	0.27643
L. braziliensis Lbra2	L. braziliensis Lbra1	0.24959	0.39467
L. braziliensis Lbra3	L. braziliensis Lbra2	0.15522	0.22994
L. braziliensis Lbra1	L. braziliensis Lbra4	0.20666	0.3603
L. guyanensis	L. panamensis	0.45578	0.82794
L. panamensis COL	L. panamensis PAN	0.090182	0.33238

## Sheet: SupplTable5
	Mean	Median	Min	Max
L. braziliensis + L. peruviana	0.00183	0.00179	4.04e-06	0.00536
L. braziliensis	0.00187	0.00181	5.15e-06	0.0063
L. braziliensis Lbra1	0.00127	0.00113	6.46e-06	0.00914
L. braziliensis Lbra2	0.00159	0.00153	1.11e-05	0.00632
L. braziliensis Lbra3	0.00153	0.00145	3.31e-06	0.0058
L. braziliensis Lbra4	0.00149	0.00142	4.53e-06	0.00554
L. peruviana X L. braziliensis	0.00111808	0.00105137	8.33333e-06	0.00404432
L. peruviana	0.00041	0.00031	2.7e-06	0.00295
L. peruviana Lper1	0.00012	6e-05	1.58e-06	0.00179
L. peruviana Lper2	0.00031	0.00021	3.37e-06	0.00318
L. guyanensis + L. panamensis	0.00105	0.00099	5.02e-06	0.01013
L. guyanensis	0.00083	0.00073	5.23e-06	0.00944
L. panamensis	0.0004	0.00031	1.45e-06	0.0097
L. panamensis Lpan1	0.0002057	0.00010187	2.03e-06	0.0105866
L. panamensis Lpan2	0.000247352	0.00014	6.66724e-06	0.0108367
L. panamensis Lpan3	0.000330553	0.000242932	2.44598e-06	0.00839012
L. panamensis Lpan4	0.000197691	9.85032e-05	4.54587e-06	0.0100623

## Sheet: SupplTable6
Chr	First	Last	Sample	Sample group	Haplotype group	Total variants	Genotyped variants	Score 1	Score 2	Score self group
NC_009305.2	510410	519554	StPierre	2	1	100	100	92	-92	-92
NC_017947.1	41	128398	StPierre	2	1	1200	1199	1071	-1071	-1071
NC_017948.1	635540	643775	LL0725	2	1	100	100	62	-62	-62
NC_009315.2	691676	705808	StPierre	2	1	100	100	82	-82	-82
NC_009316.2	100283	108575	StPierre	2	1	50	50	39	-39	-39
NC_009326.2	1989218	1994895	StPierre	2	1	100	100	100	-100	-100
NC_009327.2	21469	41921	StPierre	2	1	100	98	61	-61	-61
NC_009327.2	1867038	1874736	LL0725	2	1	100	100	63	-63	-63

## Sheet: SupplTable7
Assembly	UN0028	UN0036	LL0249	UN0066	UN0010	UN0003	UN0043	UN0005	LL0536	LL0772	PSC-1 Ref	M2904 Ref
# contigs (>= 25000 bp)	72	66	48	69	67	96	42	58	51	44	35	41
# contigs (>= 50000 bp)	70	64	47	63	53	64	41	56	50	43	35	37
Total length (>= 25000 bp)	35967034	35632921	34730710	34144764	33946137	35058290	33103106	34550707	34798261	33652687	30688794	31441306
Total length (>= 50000 bp)	35892093	35561843	34703192	33921244	33456363	33825604	33077279	34479014	34770956	33623180	30688794	31310282
# contigs	72	66	50	69	68	100	43	58	51	44	35	138
Largest contig	2686416	2672952	2711300	2058173	2703869	2049623	2669845	2787331	2341609	3014000	2610169	2686643
Total length	35967034	35632921	34769402	34144764	33962295	35138040	33110864	34550707	34798261	33652687	30688794	32068771
GC (%)	57.99	57.94	57.93	57.91	57.96	57.83	57.66	57.7	57.79	57.9	57.56	57.77
N50	872671	910255	926338	879676	905630	764434	1161120	999509	1052144	1196701	1043456	992961
N75	537923	631837	686409	615609	596566	579782	643917	614094	637898	665334	623274	641930
Complete BUSCOs (C)	129	130	130	130	130	128	130	130	130	130	130	127
Complete and single-copy BUSCOs (S)	122	127	130	127	129	119	130	126	129	128	130	127
Complete and duplicated BUSCOs (D)	7	3	0	3	1	9	0	4	1	2	0	0
Fragmented BUSCOs (F)	1	0	0	0	0	0	0	0	0	0	0	2
Missing BUSCOs (M)	0	0	0	0	0	2	0	0	0	0	0	1
Number of annotated regions/sequences	72	66	50	69	68	100	43	58	51	44	NA	NA
Number of genes	9601	9464	9386	9111	9091	10191	9562	9986	10129	9812	NA	NA
Gene density (genes/megabase)	262	260.65	264.53	262.23	262.64	285.01	283.72	283.46	284.23	286.25	NA	NA
Number of coding genes	9434	9295	9204	8963	8936	10035	9401	9801	9897	9642	NA	NA
Number of pseudogenes	336	335	285	353	288	453	341	321	369	337	NA	NA
Number of genes with function	5015	4976	4887	4781	4748	5641	5394	5546	5616	5503	NA	NA
Number of pseudogenes with function	119	118	95	115	96	149	95	93	96	97	NA	NA
Number of non-coding genes	167	169	182	148	155	156	161	185	232	170	NA	NA
Number of genes with multiple CDSs	582	519	535	556	442	781	553	609	686	638	NA	NA
Overal GC	57.96	57.91	57.91	57.88	57.89	57.8	57.63	57.67	57.76	57.86	NA	NA
Coding GC	60.59	60.65	60.61	60.58	60.57	60.8	60.62	60.7	60.77	60.68	NA	NA

## Sheet: SupplTable8
	L. (V.) braziliensis	L. (V.) braziliensis	L. (V.) braziliensis	L. (V.) braziliensis	L. (V.) braziliensis	L. (V.) panamensis	L. (V.) panamensis	L. (V.) guyanensis	L. (V.) guyanensis	L. (V.) guyanensis	Ref L. (V.) braziliensis	Ref L. (V.) panamensis
Gene-family	LL0249	UN0010	UN0028	UN0036	UN0066	LL0772	LL0536	UN0003	UN0005	UN0043	M2904	PSC-1	Annotation	p-value Wilcoxon test
1	14	3	3	3	2	3	3	3	3	3	4	0	Amastin surface glycoprotein Chr24 PF07344	1
10	0	0	0	0	0	0	0	0	0	0	3	0	NA	NA
16	24	19	8	27	18	9	12	16	15	15	2	1	Autophagy protein Atg8 ubiquitin like PF02991, ATG8/AUT7/APG8/PAZ2 LPAL13_000035900	0.142457
17	3	2	2	2	2	2	2	2	2	2	2	1	ribonucleoprotein p18 mitochondrial precursor LPAL13_150008200	0.423711
46	3	1	1	1	1	1	1	1	1	1	1	1	Domain of unknown function (DUF4139) PF13598	0.423711
49	2	1	2	1	2	2	2	2	2	3	1	1	60Kd inner membrane protein PF02096, 60Kd inner membrane protein LPAL13_110015100	0.121335
52	11	5	8	7	5	1	4	12	4	10	2	0	hypothetical protein conserved	0.528359
71	7	5	13	15	7	6	6	4	4	6	1	1	Amastin surface glycoprotein Chr20 PF07344	0.0554692
72	5	5	7	9	6	0	0	0	0	0	2	0	Amastin surface glycoprotein Chr20 PF07344	0.00729036
73	0	0	0	0	0	9	17	4	9	0	0	0	hypothetical protein conserved	0.0248084
74	0	0	0	0	0	13	12	8	5	3	0	0	hypothetical protein conserved	0.00749496
78	1	0	0	0	0	3	3	1	2	1	0	0	hypothetical protein conserved	0.0159534
81	1	1	22	2	3	1	0	0	0	0	0	0	hypothetical protein conserved	0.0163063
92	0	2	1	3	0	0	0	6	0	6	0	0	hypothetical protein conserved	1
93	0	1	2	5	0	7	1	1	4	3	1	0	Amastin surface glycoprotein Chr20 PF07344	0.288844
94	0	0	0	0	0	0	0	0	9	0	0	0	Amastin surface glycoprotein Chr20 PF07344	0.423711
108	9	4	10	8	12	3	9	2	6	5	4	0	hypothetical protein conserved	0.116074
110	6	8	4	4	5	4	7	3	3	2	1	0	hypothetical protein conserved	0.137564
111	4	3	4	4	4	2	2	2	2	3	2	1	Mitochondrial carrier protein PF00153, Mitochondrial carrier protein LPAL13_180015900	0.0101265
112	4	7	10	6	2	0	0	0	0	0	1	0	Amastin surface glycoprotein Chr20 PF07344	0.00749496
123	3	2	2	2	2	2	2	2	2	2	2	1	Glucosamine-6-phosphate isomerases/6-phosphogluconolactonase PF01182, 6-phosphogluconolactonase LPAL13_260031600	0.423711
165	4	2	2	2	2	2	2	1	2	3	1	1	Thiolase N-terminal domain/Thiolase C-terminal domain containing protein PF00108|PF02803, Thiolase N-terminal domain/Beta-ketoacyl synthase N-terminal domain/Thiolase C-terminal domain containing protein PF00108|PF00109|PF02803, 3-ketoacyl-CoA thiolase-like protein LPAL13_310021700	0.607236
168	6	9	12	13	12	14	9	12	11	11	6	1	hypothetical protein conserved	0.915266
187	2	2	2	2	2	3	3	4	2	3	1	1	hypothetical protein conserved	0.023151
192	3	1	3	1	2	0	0	0	1	0	6	0	hypothetical protein conserved	0.0159534
206	11	10	12	16	8	0	0	7	6	9	5	1	PAP2 superfamily PF01569, phosphatidic acid phosphatase protein-like protein LPAL13_000022300,phosphatidic acid phosphatase LPAL13_000018800 rank 1	0.0211767
209	2	1	2	2	2	3	2	2	2	2	2	1	ABC transporter transmembrane region/ABC transporter PF00664|PF00005, ATP-binding cassette protein subfamily C member 5 LPAL13_230007400|LPAL13_230007600|LPAL13_230008200|LPAL13_310019100|LPAL13_310019200|LPAL13_310019600, ATP-binding cassette protein subfamily C member 5 LPAL13_230007300|LPAL13_230007500	0.233038
226	5	4	5	6	3	0	0	0	0	0	3	1	Amastin surface glycoprotein Chr20 PF07344	0.00729036
241	2	3	3	3	2	0	0	0	0	0	1	0	Amastin surface glycoprotein Chr20 PF07344	0.0065017
252	7	5	8	6	6	4	9	11	5	5	3	1	FAD binding domain containing protein PF00890, FAD dependent oxidoreductase/Pyridine nucleotide-disulphide oxidoreductase/FAD binding domain/NAD(P)-binding Rossmann-like domain containing protein PF01266|PF07992|PF12831|PF00890|PF13450, NADH-dependent fumarate reductase LPAL13_340016200, Pyridine nucleotide-disulphide oxidoreductase/FAD dependent oxidoreductase/FAD binding domain/NAD(P)-binding R…	0.832004
253	40	11	12	12	5	20	21	15	18	17	6	1	Tuzin Chr20 LPAL13_000029400, Amastin surface glycoprotein PF07344	0.142457
254	2	2	2	2	2	4	2	2	2	2	2	2	KOW motif/Ribosomal L27e protein family PF00467|PF01777, ribosomal protein L27 LPAL13_320034600|LPAL13_320034800	0.423711
269	2	2	2	2	2	3	2	2	2	2	2	0	hypothetical protein conserved	0.423711
273	2	7	2	4	6	3	4	6	4	2	1	1	ZIP Zinc transporter PF02535, zinc transporter LPAL13_280027000	0.914458
289	14	21	15	16	17	17	17	17	18	14	1	1	Elongation factor Tu GTP binding domain/Elongation factor Tu domain 2/Elongation factor Tu C-terminal domain containing protein PF00009|PF03144|PF03143, elongation factor 1-alpha LPAL13_170005000	0.665414
290	4	5	5	6	2	4	4	3	3	4	3	1	expression-site associated gene (ESAG3) LPAL13_000038400|LPAL13_330019200|LPAL13_330019600	0.232823
296	1	3	2	1	3	2	2	2	2	2	2	1	hypothetical protein conserved	1
299	1	2	2	2	1	2	2	6	2	2	2	2	PLAC8 family PF04749, PLAC8 family LPAL13_010010800, PLAC8 family LPAL13_010010900, PLAC8 family LPAL13_010010800|LPAL13_010010900	0.121335
305	11	5	1	3	1	5	5	4	3	4	1	1	Amastin surface glycoprotein Chr20 PF07344	0.593566
317	5	4	5	5	1	3	2	3	2	2	0	0	hypothetical protein conserved	0.132622
333	3	3	5	3	3	3	3	3	3	3	2	2	Redoxin/AhpC/TSA family/C-terminal domain of 1-Cys peroxiredoxin PF08534|PF00578|PF10417, AhpC/TSA family/Redoxin/C-terminal domain of 1-Cys peroxiredoxin PF00578|PF08534|PF10417, AhpC/TSA family/C-terminal domain of 1-Cys peroxiredoxin LPAL13_150015900,tryparedoxin peroxidase LPAL13_150015700 rank 1	0.423711
334	3	3	3	3	3	3	3	3	3	3	3	3	Serine-threonine protein phosphatase N-terminal domain/Calcineurin-like phosphoesterase PF16891|PF00149, Protein phosphatase 2A homologues catalytic domain LPAL13_000012200,serine/threonine-protein phosphatase PP1 LPAL13_200012200 rank 1,Calcineurin-like phosphoesterase LPAL13_200012300|LPAL13_200012400 rank 1	NA
337	16	9	19	11	21	9	10	7	9	9	3	1	Histidine kinase- DNA gyrase B- and HSP90-like ATPase/Hsp90 protein PF13589|PF02518|PF00183, Hsp90 protein PF00183, heat shock protein 83-17 LPAL13_330008200	0.040609
345	3	2	3	3	3	9	5	4	4	4	4	2	ZIP Zinc transporter PF02535, iron/zinc transporter protein-like protein LPAL13_310037600|LPAL13_310037700, ZIP Zinc transporter LPAL13_310037800, iron/zinc transporter protein-like protein LPAL13_310037600|LPAL13_310037700,ZIP Zinc transporter LPAL13_310037800 rank 1	0.008784
347	6	9	4	8	5	3	3	3	3	3	8	2	MBOAT membrane-bound O-acyltransferase family PF03062, glycerol uptake protein LPAL13_000013900|LPAL13_190019000	0.00749496
363	2	2	2	3	2	1	1	1	1	1	1	1	hypothetical protein conserved	0.00558362
370	10	1	6	1	1	1	0	5	0	0	0	0	Tubulin: alpha-tubulin, Endonuclease-reverse transcriptase/Reverse transcriptase (RNA-dependent DNA polymerase) PF14529|PF00078, alpha tubulin LPAL13_290030000, Reverse transcriptase (RNA-dependent DNA polymerase) PF00078	0.101481
372	6	5	7	7	6	5	6	5	4	5	4	0	Histone H3, Core histone H2A/H2B/H3/H4/Histone-like transcription factor (CBF/NF-Y) and archaeal histone PF00125|PF00808, histone H3 LPAL13_100014400|LPAL13_100015500	0.0625669
383	6	7	4	6	5	7	7	6	9	7	0	0	hypothetical protein conserved	0.0634422
388	3	2	4	2	3	1	6	1	5	6	2	1	ATP dependent DEAD-box helicase LPAL13_200021300	0.672336
419	5	4	4	4	4	5	7	4	5	5	2	1	Enoyl-CoA hydratase/isomerase PF16113|PF00378, 3-hydroxyisobutyryl-coenzyme a hydrolase-like protein LPAL13_000024300|LPAL13_320045000|LPAL13_320045100	0.0832645
472	2	3	2	2	2	1	2	2	2	2	2	2	Ribosomal protein S19e PF01090, Ribosomal protein S19e LPAL13_030014400,40S ribosomal protein S19-like protein LPAL13_200030300 rank 1	0.233038
481	8	9	15	11	15	10	12	16	10	18	3	0	PLAC8 family PF04749, ama1 protein LPAL13_300019900	0.400525
493	0	0	0	0	0	4	8	0	5	2	0	0	hypothetical protein conserved	0.0253699
494	3	2	3	3	3	0	0	1	0	0	0	0	hypothetical protein conserved	0.00749496
511	3	5	4	3	4	3	3	3	4	4	3	3	Ribosomal protein L3 PF00297, Ribosomal protein L3 LPAL13_200031800,ribosomal protein L3 LPAL13_320039600 rank 1	0.488422
524	3	2	4	3	3	2	2	2	2	3	2	2	GPR1/FUN34/yaaH family PF01184, GPR1/FUN34/yaaH family LPAL13_030008500, GPR1/FUN34/yaaH family LPAL13_030008400	0.0832645
536	3	2	6	9	2	1	1	1	1	1	1	1	hypothetical protein conserved	0.00729036
544	2	3	1	4	4	1	1	0	1	3	0	0	hypothetical protein conserved	0.0826623
561	4	3	4	3	3	4	3	1	2	3	1	1	SelR domain containing protein PF01641, SelR domain containing protein LPAL13_280034800	0.258533
605	10	7	6	5	6	5	5	6	5	7	3	1	Hsp70 protein/MreB/Mbl protein PF00012|PF06723, Hsp70 protein LPAL13_300028600|LPAL13_300028800,heat-shock protein hsp70 LPAL13_260017100|LPAL13_280018900|LPAL13_280035900|LPAL13_280036000|LPAL13_280036500|LPAL13_300028500|LPAL13_300028700 rank 1	0.273322
620	2	2	4	1	2	2	2	2	2	2	3	0	Peptidase family M20/M25/M40/Peptidase dimerisation domain containing protein PF01546|PF07687, peptidase m20/m25/m40 family-like protein LPAL13_310025500	1
665	4	4	4	3	4	4	4	4	4	4	6	2	Hsp70 protein/MreB/Mbl protein PF00012|PF06723	0.423711
684	5	4	7	5	1	0	0	0	0	0	0	0	hypothetical protein conserved	0.00729036
693	3	2	2	2	2	2	2	2	2	2	1	1	Type II CAAX prenyl endopeptidase Rce1-like PF02517, CAAX prenyl protease 2 LPAL13_260031500	0.423711
707	3	3	3	3	3	3	3	3	3	3	3	3	Kinetoplastid membrane protein 11 PF03037	NA
763	2	2	5	3	2	2	2	2	2	2	2	2	GNS1/SUR4 family PF01151, fatty acid elongase LPAL13_140012300, fatty acid elongase LPAL13_140012400	0.179712
772	3	1	3	2	4	2	3	3	2	2	5	0	Amastin surface glycoprotein Chr20 PF07344	0.73819
782	3	5	5	6	1	3	3	3	2	3	2	0	hypothetical protein conserved	0.263552
797	2	3	3	5	2	3	3	3	4	3	4	3	EF-1 guanine nucleotide exchange domain containing protein PF00736, elongation factor 1-beta LPAL13_200012700|LPAL13_200013200,translation elongation factor 1-beta LPAL13_350020400 rank 1, translation elongation factor 1-beta LPAL13_350020400, elongation factor 1-beta LPAL13_200012700|LPAL13_200013200	0.47848
799	4	3	4	5	1	3	3	3	2	2	3	1	CRAL/TRIO domain containing protein PF00650, CRAL/TRIO N-terminal domain/CRAL/TRIO domain containing protein LPAL13_340040700,CRAL/TRIO domain containing protein LPAL13_340041000 rank 1	0.232823
828	3	0	1	3	0	0	1	0	1	0	0	0	hypothetical protein conserved	0.364346
832	2	3	4	3	3	6	4	7	8	4	6	1	sodium stibogluconate resistance protein LPAL13_000051400	0.0184908
834	11	1	3	0	1	0	0	2	0	0	0	0	hypothetical protein conserved	0.117525
840	1	2	2	2	2	2	2	2	2	2	3	2	flagellar attachment zone protein LPAL13_200011300|LPAL13_200011500	0.423711
859	2	2	2	3	2	2	2	3	3	1	2	1	Phospholipid-translocating ATPase N-terminal/E1-E2 ATPase/Cation transport ATPase (P-type)/Phospholipid-translocating P-type ATPase C-terminal PF16209|PF00122|PF13246|PF16212, phospholipid-transporting ATPase 1-like protein LPAL13_130018700	1
867	3	3	5	5	4	0	0	0	0	0	0	0	hypothetical protein conserved	0.00708872
868	4	3	5	5	4	2	4	3	2	3	0	0	hypothetical protein conserved	0.0524116
897	4	4	4	6	1	3	3	3	2	3	1	1	hypothetical protein conserved	0.126379
929	10	12	15	22	12	11	11	12	11	32	4	1	Tubulin: alpha-tubulin, Tubulin/FtsZ family GTPase domain/Tubulin C-terminal domain containing protein PF00091|PF03953, alpha tubulin LPAL13_290030000	0.668434
953	1	3	2	3	1	3	4	4	2	4	1	1	Glycosyl hydrolases family 32 N-terminal domain/Glycosyl hydrolases family 32 C terminal/PAN domain containing protein PF00251|PF08244|PF00024, beta-fructofuranosidase LPAL13_040008600|LPAL13_340011200	0.0669553
975	2	3	2	2	2	2	2	2	2	2	2	1	Ribosomal L28e protein family PF01778, 60S ribosomal protein L28 LPAL13_110014800	0.423711
978	4	3	4	3	2	4	3	1	2	3	1	1	Calcineurin-like phosphoesterase PF00149, protein phosphatase 2A catalytic subunit LPAL13_320038800,protein phosphatase 4 catalytic subunit LPAL13_280034900 rank 1,serine/threonine protein phosphatase LPAL13_250019100 rank 1	0.443194
1028	1	1	1	1	3	1	1	0	1	0	1	1	hypothetical protein conserved	0.121335
1060	1	1	1	1	1	2	1	1	1	1	4	1	hypothetical protein conserved	0.423711
1064	3	1	3	2	2	3	1	2	4	1	0	0	hypothetical protein conserved	1
1072	3	3	3	3	3	3	3	3	3	3	5	1	Transmembrane amino acid transporter protein/Tryptophan/tyrosine permease family/Amino acid permease PF01490|PF03222|PF13520, Transmembrane amino acid transporter protein/Tryptophan/tyrosine permease family PF01490|PF03222, Transmembrane amino acid transporter protein LPAL13_000005800,amino acid permease LPAL13_310023300 rank 1	NA
1145	2	2	2	2	2	2	2	3	2	2	2	2	Transmembrane amino acid transporter protein/Tryptophan/tyrosine permease family PF01490|PF03222, Transmembrane amino acid transporter protein PF01490, amino acid permease LPAL13_270013500|LPAL13_270013600|LPAL13_310008300|LPAL13_310008400	0.423711
1164	2	2	2	2	2	2	2	3	2	2	2	2	Ribosomal protein S11 PF00411, 40S ribosomal protein S14 LPAL13_280015800,Ribosomal protein S11 LPAL13_300040400 rank 1	0.423711
1198	3	2	2	4	3	2	2	3	2	2	2	1	Enolase N-terminal domain/Enolase C-terminal TIM barrel domain/Enolase C-terminal domain-like PF03952|PF00113|PF13378, Enolase N-terminal domain/Enolase C-terminal TIM barrel domain containing protein PF03952|PF00113, enolase LPAL13_140017000	0.231998
1237	2	1	3	1	2	2	2	2	2	2	1	1	XPG N-terminal domain/XPG I-region PF00752|PF00867, XPG N-terminal domain/XPG I-region LPAL13_230022300	0.605577
1284	4	3	3	6	1	3	3	3	2	2	2	1	hypothetical protein conserved	0.371093
1316	5	6	14	6	6	6	7	4	7	6	5	3	Adenylate and Guanylate cyclase catalytic domain containing protein PF00211, Periplasmic binding protein PF13458, receptor-type adenylate cyclase a LPAL13_170005100|LPAL13_170006200|LPAL13_170006400|LPAL13_170006500	1
1321	4	2	5	4	5	3	3	2	6	1	3	1	Pyruvate kinase barrel domain/Pyruvate kinase alpha/beta domain containing protein PF00224|PF02887, pyruvate kinase LPAL13_340005000	0.341287
1354	0	1	2	1	1	2	3	3	2	1	0	0	hypothetical protein conserved	0.0625669
1373	0	0	0	0	0	8	11	4	6	3	0	0	Amastin surface glycoprotein Chr20 PF07344	0.00749496
1377	2	2	3	2	2	2	2	2	2	2	2	2	Ribonucleotide reductase small chain PF00268, ribonucleoside-diphosphate reductase small chain LPAL13_220015100|LPAL13_270028800	0.423711
1385	2	2	2	3	2	2	2	2	2	2	1	1	DEAD/DEAH box helicase/Helicase conserved C-terminal domain containing protein PF00270|PF00271, eukaryotic initiation factor 4a LPAL13_010011900	0.423711
1394	3	2	6	6	2	4	4	4	3	4	0	0	hypothetical protein conserved	0.744073
1448	3	3	3	3	3	3	3	3	4	3	3	2	EF hand/EF-hand domain/EF-hand domain pair/Cytoskeletal-regulatory complex EF hand PF00036|PF13405|PF13499|PF13202|PF14658|PF13833|PF12763, calmodulin LPAL13_000026000	0.423711
1474	2	1	3	1	4	2	2	3	2	7	0	2	Amastin surface glycoprotein Chr20 PF07344	0.515181
1501	3	1	2	3	1	1	3	2	1	1	1	1	NLI interacting factor-like phosphatase PF03031, NLI interacting factor-like phosphatase LPAL13_340040300	0.57075
1509	3	3	4	2	4	5	4	5	5	2	3	0	tb-292 membrane associated protein-like protein LPAL13_000038300|LPAL13_150009900, tb-292 membrane associated protein-like protein LPAL13_150009800	0.161238
1523	3	2	2	2	2	2	2	2	2	2	2	2	Ribosomal protein 60S L18 and 50S L18e PF17135, Ribosomal protein 60S L18 and 50S L18e/Ribosomal proteins 50S-L15 50S-L18e 60S-L27A PF17135|PF00828, 60S ribosomal protein L18 LPAL13_130008600|LPAL13_350054500	0.423711
1537	1	1	1	2	1	1	3	2	1	2	1	1	hypothetical protein conserved	0.231998
1542	9	9	13	13	7	16	15	7	22	16	2	1	ATG8/AUT7/APG8/PAZ2 LPAL13_090006700, ATG8/AUT7/APG8/PAZ2 LPAL13_090006600	0.11273
1543	1	0	1	1	0	2	2	4	2	2	1	0	WD domain G-beta repeat PF00400, WD domain G-beta repeat LPAL13_350011100	0.00856192
1580	1	1	1	1	1	1	3	1	1	1	1	1	ABC-2 family transporter protein/ABC transporter PF12698|PF00005, ATP-binding cassette protein subfamily A member 2 LPAL13_000045100|LPAL13_020007600|LPAL13_110015800|LPAL13_110015900|LPAL13_110016100|LPAL13_110016200|LPAL13_110016400|LPAL13_110016600|LPAL13_110016700|LPAL13_150013000|LPAL13_270016700, ABC transporter PF00005, ATP-binding cassette protein subfamily A member 2 LPAL13_000035100|LPA…	0.423711
1588	2	2	3	2	2	2	2	2	2	2	2	1	Proteasome subunit PF00227, proteasome beta 7 subunit LPAL13_200047000|LPAL13_200047200	0.423711
1589	4	3	3	3	3	4	4	4	4	4	3	2	ATP synthase subunit C PF00137, ATPase subunit 9 LPAL13_260009400, ATPase subunit 9 LPAL13_210012500, ATPase subunit 9 LPAL13_070017300	0.0199645
1624	2	2	2	2	2	4	3	2	2	1	1	1	Amastin surface glycoprotein Chr30 PF07344	0.607236
1633	2	2	2	2	2	2	2	2	2	2	3	1	hypothetical protein conserved	NA
1661	3	0	1	1	1	2	2	2	2	2	0	1	hypothetical protein conserved	0.113693
1670	3	2	3	3	3	2	3	2	2	2	1	1	hypothetical protein conserved	0.0929573
1682	1	2	3	4	3	1	2	2	3	3	1	1	Leucine rich repeat LPAL13_030014100	0.583882
1723	1	1	1	3	1	1	1	1	1	1	0	0	hypothetical protein conserved	0.423711
1725	2	3	3	4	3	2	2	2	2	2	2	2	MFS_1 like family PF12832, Major Facilitator Superfamily LPAL13_330018800, Major Facilitator Superfamily/MFS_1 like family/Nucleoside H+ symporter PF07690|PF12832|PF03825	0.023151
1728	3	3	3	3	2	1	1	1	1	1	4	0	Eukaryotic elongation factor 5A hypusine DNA-binding OB fold PF01287, eukaryotic initiation factor 5a LPAL13_250013500	0.00558362
1731	2	2	4	3	2	4	4	3	3	3	0	0	hypothetical protein conserved	0.150282
1744	4	3	4	6	1	3	3	3	2	2	1	1	Pre-rRNA-processing protein PNO1 LPAL13_340040500	0.232823
1756	1	1	1	1	1	4	4	4	4	2	0	0	hypothetical protein conserved	0.00558362
1774	10	5	8	5	4	2	3	2	1	9	1	1	hypothetical protein conserved	0.0926917
1857	2	2	2	3	2	3	3	5	3	3	3	2	Peptidase family M20/M25/M40/Peptidase dimerisation domain containing protein PF01546|PF07687, N-acyl-L-amino acid amidohydrolase LPAL13_200065900	0.0209213
1928	4	3	5	5	4	2	3	3	2	3	0	0	hypothetical protein conserved	0.0222982
1933	2	2	4	1	2	2	2	2	2	3	1	2	60s Acidic ribosomal protein PF00428, 60S acidic ribosomal protein P2 LPAL13_150016500, 60s Acidic ribosomal protein LPAL13_150016600	0.79717
1945	3	2	3	4	3	0	0	0	0	0	0	0	hypothetical protein conserved	0.00669438
1968	2	2	2	3	2	2	2	2	2	2	2	2	Ribosomal L15 PF00827, ribosomal protein L15 LPAL13_300041100|LPAL13_340023300	0.423711
2002	1	1	1	1	1	1	1	3	1	1	1	1	Glycosyl transferase family 2 PF00535, beta-galactofuranosyltransferase-like protein LPAL13_250005000	0.423711
2021	3	1	4	3	3	8	10	4	7	1	3	2	Microtubule binding/Kinesin motor domain containing protein PF16796|PF00225, Kinesin motor domain containing protein PF00225, kinesin LPAL13_200021200	0.136333
2045	8	5	8	6	7	14	11	11	11	11	15	6	Histone-like transcription factor (CBF/NF-Y) and archaeal histone PF00808, histone H4 LPAL13_150005000|LPAL13_340017800, Core histone H2A/H2B/H3/H4 LPAL13_350005500, TATA box binding protein associated factor (TAF) PF02969, Core histone H2A/H2B/H3/H4 LPAL13_250027900, histone H4 LPAL13_060005100, Core histone H2A/H2B/H3/H4 LPAL13_250027900|LPAL13_350005500, Core histone H2A/H2B/H3/H4 LPAL13_35000…	0.00946735
2049	14	12	18	16	18	11	16	0	15	15	5	0	Epidermal growth factor-like domain LPAL13_090015100	0.246252
2061	4	3	4	3	3	4	3	1	2	3	1	1	Histidine phosphatase superfamily (branch 2) PF00328, membrane-bound acid phosphatase LPAL13_280034700	0.258533
2107	3	1	3	4	2	2	3	2	2	2	1	1	Protein kinase domain/Protein tyrosine and serine/threonine kinase PF00069|PF07714, Wee1-like protein kinase LPAL13_200014300	0.497823
2108	3	4	5	4	5	1	2	2	3	3	0	0	hypothetical protein conserved	0.0188657
2127	4	2	2	2	2	2	2	2	2	2	2	1	Ribosomal protein S8e PF01201, 40S ribosomal protein S8 LPAL13_240027800	0.423711
2206	3	2	2	2	2	2	2	2	2	2	2	1	Amino acid kinase family PF00696, glutamate 5-kinase LPAL13_260031700	0.423711
2207	1	1	1	1	1	3	4	1	3	1	1	1	Acyltransferase PF01553, Acyltransferase LPAL13_290026400	0.0707011
2236	3	2	3	3	3	2	3	2	2	2	2	1	hypothetical protein conserved	0.0929573
2261	2	2	4	2	2	2	2	2	2	2	2	2	Ribosomal protein L6e PF01159, 60S ribosomal protein L6 LPAL13_000016600|LPAL13_150015300	0.423711
2280	2	4	4	2	5	3	3	2	4	3	3	1	Leishmanolysin PF01457, GP63-like protein leishmanolysin-like protein LPAL13_310025300	0.664389
2303	7	6	7	7	7	7	7	7	6	6	7	0	Histone H2A, Core histone H2A/H2B/H3/H4/C-terminus of histone H2A PF00125|PF16211, C-terminus of histone H2A PF16211, Core histone H2A/H2B/H3/H4 LPAL13_210015400|LPAL13_210015500, Core histone H2A/H2B/H3/H4 LPAL13_210015300, histone H2A LPAL13_290021900|LPAL13_290022000, Core histone H2A/H2B/H3/H4 LPAL13_210015300|LPAL13_210015400|LPAL13_210015500	0.600471
2319	3	2	3	3	4	7	9	5	7	7	2	1	Ubiquitin-conjugating enzyme PF00179, ubiquitin-conjugating enzyme LPAL13_200016300	0.010176
2332	2	2	2	2	3	2	2	3	2	2	2	2	Nitronate monooxygenase/IMP dehydrogenase / GMP reductase domain/FMN-dependent dehydrogenase/Dihydroorotate dehydrogenase PF03060|PF00478|PF01070|PF01180, enoyl-[acyl-carrier-protein] reductase LPAL13_210019500	1
2374	3	4	3	3	3	4	4	4	6	4	4	1	Oligosaccharyl transferase STT3 subunit PF02516, oligosaccharyl transferase subunit LPAL13_340015500|LPAL13_340015600|LPAL13_340015700,Oligosaccharyl transferase STT3 subunit LPAL13_270009800 rank 1	0.0209213
2394	1	2	3	2	1	1	1	1	2	1	1	1	BT1 family PF03092, BT1 family LPAL13_000040800|LPAL13_100008700|LPAL13_100008800,folate/biopterin transporter LPAL13_000013300|LPAL13_000040900|LPAL13_000053300|LPAL13_040005900|LPAL13_060019100|LPAL13_100008900|LPAL13_100019800|LPAL13_340057700 rank 1, BT1 family LPAL13_000040800|LPAL13_060008500|LPAL13_100008700|LPAL13_100008800,folate/biopterin transporter LPAL13_000013300|LPAL13_000040900|LP…	0.231998
2424	3	2	2	5	1	2	4	4	4	4	5	1	Microtubule binding/Kinesin motor domain containing protein PF16796|PF00225, Kinesin motor domain/Microtubule binding PF00225|PF16796, kinesin K39 LPAL13_000025100|LPAL13_000027100|LPAL13_140016400, kinesin K39 LPAL13_000025100|LPAL13_000027100|LPAL13_140016400,kinesin-like protein LPAL13_050012000 rank 1, kinesin K39 LPAL13_000025100|LPAL13_000027100|LPAL13_140016100|LPAL13_140016400, kinesin K3…	0.274916
2445	2	2	4	4	2	2	2	2	2	2	2	2	hypothetical protein conserved	0.177016
2465	2	1	2	1	2	2	2	2	2	3	2	1	Elongation factor Tu GTP binding domain/Elongation factor Tu C-terminal domain containing protein PF00009|PF03143, eukaryotic release factor 3 LPAL13_110015000	0.121335
2481	2	2	2	2	2	2	8	3	2	3	2	1	D-isomer specific 2-hydroxyacid dehydrogenase NAD binding domain containing protein PF02826, D-isomer specific 2-hydroxyacid dehydrogenase NAD binding domain/S-adenosyl-L-homocysteine hydrolase NAD binding domain/NAD binding domain of 6-phosphogluconate dehydrogenase PF02826|PF00670|PF03446, D-isomer specific 2-hydroxyacid dehydrogenase NAD binding domain/Acetohydroxy acid isomeroreductase NADPH-…	0.0707011
2483	4	4	4	4	4	4	4	4	4	4	1	1	Paraflagellar rod protein PF05149, paraflagellar rod protein 1D LPAL13_000007500	NA
2492	1	1	0	4	1	1	1	1	1	1	1	1	Vps51/Vps67 PF08700, Vps51/Vps67 LPAL13_020006300	1
2497	1	1	1	2	3	1	1	0	1	0	0	0	hypothetical protein conserved	0.0764156
2510	2	2	3	3	0	0	0	1	1	1	0	0	hypothetical protein conserved	0.0846698
2515	5	5	5	6	5	7	8	8	7	6	0	0	hypothetical protein conserved	0.0123183
2530	4	2	4	5	1	3	3	3	2	2	1	1	hypothetical protein conserved	0.519249
2533	2	2	2	2	2	3	3	2	3	2	2	2	Ribosomal protein S4/S9 N-terminal domain/S4 domain containing protein PF00163|PF01479, 40S ribosomal protein S9 LPAL13_070012700,ribosomal protein S4 LPAL13_350018400 rank 1	0.0667981
2541	2	2	4	4	2	2	2	2	2	2	2	2	Acyl CoA binding protein PF00887, Acyl CoA binding protein LPAL13_170011700, Acyl CoA binding protein LPAL13_170011400	0.177016
2610	2	2	2	2	2	1	1	1	1	2	3	1	Creatinase/Prolidase N-terminal domain/Metallopeptidase family M24/C-terminal region of peptidase_M24 PF16189|PF00557|PF16188, Creatinase/Prolidase N-terminal domain/Metallopeptidase family M24/C-terminal region of peptidase_M24 PF01321|PF16189|PF00557|PF16188, Metallopeptidase family M24/C-terminal region of peptidase_M24 PF00557|PF16188, Cytochrome b5-like Heme/Steroid binding domain/Creatinase…	0.0199645
2625	2	2	2	2	2	2	2	2	3	2	2	2	Microtubule binding/Kinesin motor domain containing protein PF16796|PF00225, kinesin LPAL13_000005700|LPAL13_160019800|LPAL13_160019900	0.423711
2634	4	5	5	6	5	3	2	5	3	3	2	2	hypothetical protein conserved	0.0380382
2659	1	2	1	1	1	2	3	1	1	1	1	1	PAP2 superfamily PF01569, PAP2 superfamily LPAL13_180010000	0.518605
2734	3	2	3	3	3	0	0	0	0	0	1	1	hypothetical protein conserved	0.00558362
2737	3	0	0	0	0	0	0	0	0	0	0	0	hypothetical protein conserved	0.423711
2751	3	0	3	1	1	7	9	6	6	7	0	0	hypothetical protein conserved	0.0111594
2766	5	6	3	5	5	11	7	9	9	5	0	0	hypothetical protein conserved	0.0399624
2783	4	2	3	3	2	2	3	2	2	2	1	1	hypothetical protein conserved	0.231998
2785	2	2	2	2	2	2	2	2	3	2	2	2	Nodulin-like/Major Facilitator Superfamily PF06813|PF07690, Major Facilitator Superfamily LPAL13_290019700|LPAL13_290019800	0.423711
2802	2	1	2	3	1	2	4	3	2	2	1	1	Nrap protein domain 3/Nrap protein nucleotidyltransferase domain 4/Nrap protein PAP/OAS1-like domain 5 PF17404|PF17405|PF17406, Nrap protein LPAL13_180012300	0.217154
2817	1	2	1	1	1	2	2	2	4	2	1	0	AMP-binding enzyme/AMP-binding enzyme C-terminal domain containing protein PF00501|PF13193, 4-coumarate:coa ligase-like protein LPAL13_000052900	0.0209213
2843	3	3	3	3	3	3	3	2	4	3	3	2	Protein of unknown function (DUF3184) LPAL13_000010600	1
2903	2	1	2	2	2	3	1	2	2	2	1	2	Aminoacyl-tRNA editing domain/tRNA synthetase class II core domain (G H P S and T)/Anticodon binding domain/Prolyl-tRNA synthetase C-terminal PF04073|PF00587|PF03129|PF09180, Aminoacyl-tRNA editing domain containing protein LPAL13_180015500,bifunctional aminoacyl-tRNA synthetase LPAL13_180015400 rank 1	0.698535
2963	3	2	2	3	2	2	3	2	2	2	1	2	hypothetical protein conserved	0.600471
2993	1	1	1	1	1	3	3	2	3	3	4	2	Protein kinase domain/Protein tyrosine and serine/threonine kinase PF00069|PF07714, protein kinase-like protein LPAL13_000029900|LPAL13_310023600	0.00558362
3101	2	2	2	2	2	2	2	2	2	2	3	1	Ribosomal protein L19e PF01280, 60S ribosomal protein L19 LPAL13_060009700	NA
3139	4	4	4	4	5	5	5	5	6	5	1	1	Elongation factor Tu GTP binding domain/Elongation factor Tu domain 2/Elongation Factor G domain III/Elongation factor G domain IV/Elongation factor G C-terminus PF00009|PF03144|PF14492|PF03764|PF00679, elongation factor 2 LPAL13_350006800	0.0209213
3147	1	1	1	3	1	1	1	1	2	1	1	1	25 Kd elongation factor 1-beta LPAL13_200012800	1
3205	1	1	2	2	2	2	2	2	2	3	2	2	ABC transporter transmembrane region/ABC transporter PF00664|PF00005, ATP-binding cassette protein subfamily C member 5 LPAL13_230007400|LPAL13_230007600|LPAL13_230008200|LPAL13_310019100|LPAL13_310019200|LPAL13_310019600	0.121335
3258	1	1	1	1	1	3	6	1	3	2	2	0	Amastin surface glycoprotein Chr20 PF07344	0.0248084
3277	3	5	4	4	5	6	5	5	3	6	0	0	hypothetical protein conserved	0.231293
3287	1	1	1	1	1	3	3	1	3	1	1	1	hypothetical protein conserved	0.0667981
3356	2	2	2	2	2	2	2	2	2	2	3	0	Rab-GTPase-TBC domain containing protein PF00566, Rab-GTPase-TBC domain containing protein LPAL13_300008700|LPAL13_330032400	NA
3418	2	2	5	2	1	1	1	1	1	1	0	0	hypothetical protein conserved	0.023151
3419	2	3	4	2	2	4	2	3	4	2	2	1	hypothetical protein conserved	0.57075
3421	3	2	3	3	3	21	36	14	12	3	1	0	tuzin LPAL13_080009800	0.0258576
3444	2	2	4	2	3	3	5	0	1	2	2	1	p25-alpha PF05517	0.665414
3458	3	3	3	3	3	3	3	3	3	3	3	2	Ribosomal Proteins L2 RNA binding domain/Ribosomal Proteins L2 C-terminal domain containing protein PF00181|PF03947, 60S ribosomal protein L2 LPAL13_320047600|LPAL13_340019000	NA
3485	4	4	9	6	4	5	4	4	4	4	4	1	BT1 family PF03092, BT1 family LPAL13_000040800|LPAL13_100008700|LPAL13_100008800,folate/biopterin transporter LPAL13_000013300|LPAL13_000040900|LPAL13_000053300|LPAL13_040005900|LPAL13_060019100|LPAL13_100008900|LPAL13_100019800|LPAL13_340057700 rank 1, BT1 family LPAL13_000040800|LPAL13_060008500|LPAL13_100008700|LPAL13_100008800,folate/biopterin transporter LPAL13_000013300|LPAL13_000040900|LP…	0.440686
3489	3	2	2	3	2	2	2	2	2	2	0	0	hypothetical protein conserved	0.177016
3493	4	3	3	2	2	0	0	2	3	1	1	0	hypothetical protein conserved	0.0856734
3495	5	6	5	5	5	8	7	6	6	6	7	0	phosphoglycan beta 13 galactosyltransferase 2 LPAL13_000042300	0.0192961
3510	2	2	2	2	2	3	2	2	2	2	2	1	Alcohol dehydrogenase GroES-like domain/Zinc-binding dehydrogenase PF08240|PF00107, d-xylulose reductase LPAL13_330009900	0.423711
3520	2	3	2	6	2	2	4	3	2	2	0	0	hypothetical protein conserved	1
3532	2	2	3	3	3	1	1	1	1	1	0	0	hypothetical protein conserved	0.0065017
3563	6	2	0	3	2	2	7	1	3	0	1	1	Amastin surface glycoprotein Chr20 PF07344	1
3580	2	2	2	2	2	2	2	2	2	3	2	2	Acetyl-coenzyme A synthetase N-terminus/AMP-binding enzyme/AMP-binding enzyme C-terminal domain containing protein PF16177|PF00501|PF13193, AMP-binding enzyme LPAL13_000016500,acetyl-CoA synthetase LPAL13_230011500 rank 1	0.423711
3621	2	2	2	1	1	2	2	2	3	1	0	0	hypothetical protein conserved	0.402784
3624	5	7	10	5	5	5	4	4	5	6	4	1	Histone H2B, Core histone H2A/H2B/H3/H4 PF00125, histone H2B LPAL13_190008400|LPAL13_190008600, Core histone H2A/H2B/H3/H4 LPAL13_090019000, Core histone H2A/H2B/H3/H4/Histone-like transcription factor (CBF/NF-Y) and archaeal histone PF00125|PF00808	0.179712
3630	3	3	3	3	3	3	3	3	3	3	3	3	Ribosomal protein S30 PF04758, 40S ribosomal protein S30 LPAL13_300012300|LPAL13_300012400, 40S ribosomal protein S30 LPAL13_300012500	NA
3666	1	3	3	2	1	1	2	3	3	2	0	0	hypothetical protein conserved	0.824848
3687	5	4	3	7	3	3	3	4	3	4	2	1	Ribosomal large subunit proteins 60S L5 and 50S L18/Ribosomal L18 C-terminal region containing protein PF17144|PF14204, 60S ribosomal protein L5 LPAL13_340023200	0.366053
3740	1	1	1	1	1	3	3	1	2	1	1	1	hypothetical protein conserved	0.0707011
3766	2	2	3	2	2	2	2	2	2	2	2	2	Ribosomal protein S5 N-terminal domain/Ribosomal protein S5 C-terminal domain containing protein PF00333|PF03719, 40S ribosomal protein S2 LPAL13_320009600	0.423711
3769	2	1	2	3	1	1	2	2	2	2	1	1	Mannosyltransferase (PIG-V) PF04188, mannosyltransferase-II LPAL13_180012500	1
3841	1	0	0	2	1	3	2	1	3	4	0	0	hypothetical protein conserved	0.0425634
3848	2	3	3	3	2	1	1	1	1	1	0	0	hypothetical protein conserved	0.0065017
3870	2	2	5	2	1	1	1	1	1	1	1	1	Glycosyl transferases group 1 PF13692|PF00534, mannosyltransferase-like protein LPAL13_310024600	0.023151
3894	3	4	5	6	1	3	3	3	2	0	1	0	ABC1 atypical kinase-like domain containing protein PF03109, ABC1 family LPAL13_330019400	0.161238
3909	2	2	2	2	1	3	3	3	3	3	3	1	BT1 family PF03092, BT1 family LPAL13_000040800|LPAL13_100008700|LPAL13_100008800,folate/biopterin transporter LPAL13_000013300|LPAL13_000040900|LPAL13_000053300|LPAL13_040005900|LPAL13_060019100|LPAL13_100008900|LPAL13_100019800|LPAL13_340057700 rank 1, BT1 family LPAL13_000040800|LPAL13_060008500|LPAL13_100008700|LPAL13_100008800,folate/biopterin transporter LPAL13_000013300|LPAL13_000040900|LP…	0.00558362
3951	1	0	0	0	0	3	3	2	7	3	0	0	hypothetical protein conserved	0.008784
4016	2	2	4	2	2	2	2	2	2	2	4	1	Phosphoenolpyruvate carboxykinase PF01293, glycosomal phosphoenolpyruvate carboxykinase LPAL13_270025800|LPAL13_270025900	0.423711
4042	2	5	4	15	3	1	1	1	2	4	2	1	Amastin surface glycoprotein Chr20 PF07344	0.0554692
4080	2	2	2	2	2	3	2	2	2	2	2	2	Ribosomal proteins L26 eukaryotic L24P archaeal/KOW motif containing protein PF16906|PF00467, ribosomal protein L24 LPAL13_240027600,60S ribosomal protein L26 LPAL13_340021200 rank 1	0.423711
4123	4	3	4	5	1	3	3	2	2	3	1	1	FYVE zinc finger containing protein PF01363, zinc finger protein LPAL13_340040100	0.232823
4131	2	2	2	2	2	2	2	2	2	3	1	1	Nodulin-like PF06813	0.423711
4149	3	4	6	3	4	4	5	3	4	3	6	1	Ubiquitin-2 like Rad60 SUMO-like/Ubiquitin family/Ubiquitin-like domain containing protein PF11976|PF00240|PF14560, Ubiquitin-2 like Rad60 SUMO-like/Ubiquitin family/Ribosomal L40e family PF11976|PF00240|PF01020, polyubiquitin LPAL13_350044100,ubiquitin-fusion protein LPAL13_000014300 rank 1,Ubiquitin family LPAL13_350044000 rank 1, ubiquitin-fusion protein LPAL13_000014300, polyubiquitin LPAL13_…	1
4164	4	4	5	5	1	3	3	2	2	3	1	1	hypothetical protein conserved	0.135099
4168	2	2	4	2	2	2	2	2	2	2	2	2	Ribosomal protein L24e PF01246, ribosomal protein L24 LPAL13_350016600|LPAL13_350016900	0.423711
4178	2	3	2	4	2	2	2	2	2	2	4	2	Enoyl-CoA hydratase/isomerase PF00378|PF16113, Enoyl-CoA hydratase/isomerase family LPAL13_310028500,32-trans-enoyl-CoA isomerase mitochondrial precursor LPAL13_310027700 rank 1	0.179712
4181	4	3	4	5	1	3	3	2	2	3	1	1	RecF/RecN/SMC N terminal domain/AAA domain/AAA domain putative AbiEii toxin Type IV TA system/SMC proteins Flexible Hinge Domain PF02463|PF13476|PF13304|PF06470, structural maintenance of chromosome (SMC) family protein LPAL13_340040200	0.232823
4256	2	2	2	2	2	2	2	2	3	2	2	2	Calcineurin-like phosphoesterase PF00149, phosphoprotein phosphatase LPAL13_130018400|LPAL13_130019100	0.423711
4314	2	2	2	2	2	3	3	3	3	3	3	3	Methyltransferase TRM13 PF05206, Methyltransferase TRM13 LPAL13_240011000|LPAL13_240011100	0.00397675
4345	3	2	3	2	3	3	3	3	3	4	2	2	Ribosomal protein S8 PF00410, 40S ribosomal protein S15A LPAL13_000007800|LPAL13_110015400	0.121335
4489	2	2	2	2	2	2	2	3	2	2	2	2	DnaJ domain containing protein PF00226, DnaJ domain containing protein LPAL13_140005900	0.423711
4498	2	2	2	4	2	2	2	2	2	2	2	2	Ribosomal protein L14 PF01929, 60S ribosomal protein L14 LPAL13_220017700|LPAL13_220018100	0.423711
4554	3	2	2	3	2	1	1	1	1	1	0	1	hypothetical protein conserved	0.0065017
4568	1	1	1	0	1	2	2	3	2	3	2	1	Ribosomal protein S7e PF01251, ribosomal protein S7 LPAL13_010008800,Ribosomal protein S7e LPAL13_010008700 rank 1	0.00856192
4575	2	2	2	2	2	2	2	2	2	3	1	1	RS4NT (NUC023) domain/S4 domain/Ribosomal family S4e/KOW motif/40S ribosomal protein S4 C-terminus PF08071|PF01479|PF00900|PF00467|PF16121, Ribosomal family S4e/KOW motif containing protein LPAL13_130015600,40S ribosomal protein S4 LPAL13_130015700 rank 1	0.423711
4869	2	2	2	2	2	2	2	3	2	2	2	2	Ubiquitin family/Ribosomal protein S27a PF00240|PF01599, ubiquitin/ribosomal protein S27a LPAL13_350011600,Ribosomal protein S27a LPAL13_140018100 rank 1	0.423711
4916	1	1	1	1	1	1	1	1	1	4	0	0	BT1 family PF03092, BT1 family LPAL13_140019300	0.423711
4923	2	2	3	3	3	2	3	2	2	2	3	1	Ubiquitin-conjugating enzyme PF00179, ubiquitin-conjugating enzyme E2 LPAL13_200013800	0.270344
4996	3	2	2	2	1	2	2	2	3	2	3	1	hypothetical protein conserved	0.698535
5025	4	3	6	3	5	3	3	3	7	3	2	1	Ribosomal protein L4/L1 family/60S ribosomal protein L4 C-terminal domain containing protein PF00573|PF14374, Ribosomal protein L4/L1 family/60S ribosomal protein L4 C-terminal domain containing protein LPAL13_290015400,ribosomal protein L1a LPAL13_000025000|LPAL13_290015300 rank 1	0.480177
5105	2	2	2	3	2	2	2	2	2	2	2	2	Ribosomal protein L13 PF00572, ribosomal protein L13 LPAL13_200013400,60S ribosomal protein L13a LPAL13_150007200 rank 1	0.423711
5108	4	3	3	3	3	3	3	3	3	3	2	1	ATP synthase alpha/beta family nucleotide-binding domain/ATP synthase alpha/beta chain C terminal domain containing protein PF00006|PF00306, ATPase alpha subunit LPAL13_000023700|LPAL13_050009600	0.423711
5140	4	4	4	4	6	3	3	3	7	3	2	1	Paraflagellar rod protein PF05149, paraflagellar rod protein 1D LPAL13_160019400, paraflagellar rod protein 1D LPAL13_000007500|LPAL13_160019400	0.118797
5162	2	2	1	2	1	2	2	3	2	1	1	0	Protein kinase domain containing protein PF00069, protein kinase LPAL13_010011600, protein kinase LPAL13_010011500	0.402784
5201	3	3	3	3	3	5	5	5	5	3	4	1	hypothetical protein conserved	0.0199645
5288	1	1	0	0	1	1	1	1	3	1	1	1	IQ calmodulin-binding motif containing protein PF00612	0.121335
5298	3	3	4	2	1	2	2	2	2	1	2	0	adenylate cyclase regulatory protein-like protein LPAL13_190023000	0.217154
5373	2	3	4	2	2	4	2	3	3	2	1	2	Transmembrane amino acid transporter protein/Tryptophan/tyrosine permease family PF01490|PF03222, amino acid permease 3 LPAL13_000030300	0.73373
5473	1	1	1	1	1	3	2	2	3	2	0	0	hypothetical protein conserved	0.0065017
5607	1	2	0	1	3	3	4	6	4	5	0	0	hypothetical protein conserved	0.0153332
5629	1	1	1	1	0	2	4	3	2	2	1	1	hypothetical protein conserved	0.008784
5731	1	2	1	3	1	1	1	1	1	1	2	1	hypothetical protein conserved	0.179712
5840	1	1	2	1	1	1	1	3	2	1	1	1	WD domain G-beta repeat PF00400, WD domain G-beta repeat LPAL13_330014600	0.518605
5956	2	2	2	3	2	2	2	2	2	2	2	2	ADP-ribosylation factor family/Signal recognition particle receptor beta subunit/Ras of Complex Roc domain of DAPkinase/Gtr1/RagA G protein conserved region/Ras family PF00025|PF09439|PF08477|PF04670|PF00071, ADP-ribosylation factor family/Signal recognition particle receptor beta subunit/50S ribosome-binding GTPase/Ras of Complex Roc domain of DAPkinase/Gtr1/RagA G protein conserved region/Ras f…	0.423711
6056	1	1	1	4	1	2	2	2	2	2	2	1	Mitochondrial carrier protein PF00153, mitochondrial phosphate transporter LPAL13_340050400, mitochondrial phosphate transporter LPAL13_340050400,phosphate carrier protein mitochondrial precursor-like protein LPAL13_050007600 rank 1	0.105969
6176	1	1	1	1	1	2	1	1	1	1	3	1	hypothetical protein conserved	0.423711
6276	2	2	2	2	2	2	2	2	2	2	3	1	Cation transporter/ATPase N-terminus/E1-E2 ATPase/haloacid dehalogenase-like hydrolase PF00690|PF00122|PF00702, P-type H+-ATPase LPAL13_180018000	NA
6413	1	0	1	0	0	2	2	3	2	2	0	0	hypothetical protein conserved	0.00856192
6482	1	1	1	1	1	1	1	3	1	1	1	1	Acetyltransferase (GNAT) family/FR47-like protein PF00583|PF08445, n-terminal acetyltransferase complex ard1 subunit homolog LPAL13_250005100	0.423711
6501	1	1	1	1	1	2	2	2	4	2	0	0	hypothetical protein conserved	0.00558362
6549	2	2	4	2	2	2	2	2	2	2	2	2	Plectin/S10 domain containing protein PF03501, 40S ribosomal protein S10 LPAL13_350015800	0.423711
6550	3	3	6	3	2	3	3	3	3	3	3	1	Cathepsin propeptide inhibitor domain (I29)/Papain family cysteine protease PF08246|PF00112, Cathepsin propeptide inhibitor domain (I29)/Papain family cysteine protease/Protein of unknown function (DUF3586) PF08246|PF00112|PF12131, Papain family cysteine protease/Protein of unknown function (DUF3586) LPAL13_080011400,cathepsin L-like protease LPAL13_080011500 rank 1	1
6612	2	1	2	2	3	1	1	2	1	1	1	0	Aldose 1-epimerase PF01263, aldose 1-epimerase-like protein LPAL13_340014800	0.0832645
6621	2	2	2	2	2	2	2	3	2	2	2	1	Glycosyl hydrolases family 32 N-terminal domain/Glycosyl hydrolases family 32 C terminal PF00251|PF08244, sucrose hydrolase-like protein LPAL13_230017100|LPAL13_230017200|LPAL13_270031800	0.423711
6651	2	2	3	2	2	2	2	2	2	2	2	2	ESSS subunit of NADH:ubiquinone oxidoreductase (complex I) PF10183, ESSS subunit of NADH:ubiquinone oxidoreductase (complex I) LPAL13_200046900	0.423711
6676	2	2	2	6	2	3	4	2	4	3	1	1	Lipase (class 3) PF01764	0.261889
6703	1	1	1	1	1	3	2	2	1	1	1	1	splicing factor ptsr1 interacting protein LPAL13_200009100	0.0707011
6725	2	2	3	3	2	2	2	2	2	2	2	2	GRAM domain/VAD1 Analog of StAR-related lipid transfer domain containing protein PF02893|PF16016, VAD1 Analog of StAR-related lipid transfer domain containing protein PF16016	0.177016
6819	1	1	2	3	1	1	1	2	1	1	0	0	hypothetical protein conserved	0.518605
6846	1	2	5	1	1	4	3	3	2	3	3	1	AAA domain (dynein-related subfamily)/ATPase family associated with various cellular activities (AAA) PF07728|PF00004, ATPase family associated with various cellular activities (AAA) LPAL13_000029600	0.162587
7035	2	2	3	2	2	2	2	3	2	2	2	2	KH domain/Ribosomal protein S3 C-terminal domain containing protein PF07650|PF00189, 40S ribosomal protein S3 LPAL13_150014700|LPAL13_330014200	1
7060	1	1	1	1	1	1	1	3	1	1	1	1	rRNA (uridine-N3-)-methyltransferase BTM5-like PF10354, Domain of unknown function (DUF2431) LPAL13_250005200	0.423711
7066	1	2	2	2	2	2	2	2	2	2	3	1	ATP synthase alpha/beta family beta-barrel domain/ATP synthase alpha/beta family nucleotide-binding domain containing protein PF02874|PF00006, ATPase beta subunit LPAL13_250017700	0.423711
7078	2	2	3	2	2	2	2	2	2	2	1	1	developmentally regulated protein LPAL13_150015800|LPAL13_150016000	0.423711
7088	2	2	2	1	1	6	18	7	5	2	0	0	hypothetical protein conserved	0.0231856
7123	2	2	2	2	3	2	2	2	2	4	2	1	60S acidic ribosomal protein LbrM5,0401|LbrM5,0402, 60S acidic ribosomal protein LPAL13_150009200, 60s Acidic ribosomal protein PF00428	1
7126	2	2	2	2	2	2	2	1	3	2	2	2	S25 ribosomal protein PF03297, ribosomal protein S25 LPAL13_250017800, ribosomal protein S25 LPAL13_200008200	1
7192	1	0	0	3	3	0	0	0	0	0	1	0	hypothetical protein conserved	0.0707011
7194	1	1	1	1	1	5	6	0	6	5	0	0	hypothetical protein conserved	0.11625
7195	0	0	0	0	0	0	0	4	0	0	0	0	hypothetical protein conserved	0.423711
7250	1	1	3	2	1	1	1	1	1	2	3	1	hypothetical protein conserved	0.518605
7288	1	1	1	1	1	1	1	1	1	4	1	1	Myo-inositol-1-phosphate synthase PF07994|PF01658, inositol-3-phosphate synthase LPAL13_140019200	0.423711
7449	2	2	2	2	4	2	2	2	3	2	3	2	Acyltransferase PF01553, acyltransferase-like protein copy 1 LPAL13_040017100, acyltransferase-like protein copy 2 LPAL13_040017200	1
7486	1	1	1	2	1	9	10	10	11	4	3	1	Sugar (and other) transporter/Major Facilitator Superfamily PF00083|PF07690	0.00946735
7494	2	0	0	1	0	39	12	6	12	5	2	1	Opioid growth factor receptor repeat PF04680, Opioid growth factor receptor repeat LPAL13_330040200, Opioid growth factor receptor repeat LPAL13_330040200|LPAL13_330040300, Opioid growth factor receptor repeat LPAL13_330040300	0.0109095
7686	2	2	1	2	3	2	2	3	2	2	1	1	ATPase family associated with various cellular activities (AAA)/AAA lid domain/AAA domain (Cdc48 subfamily)/AAA domain (dynein-related subfamily)/C-terminal D2-small domain of ClpB protein PF00004|PF17871|PF07724|PF07728|PF10431, Heat shock protein 100 kDa LPAL13_270033900|LPAL13_290017400	0.698535
7765	1	0	4	3	5	1	3	1	1	1	2	1	hypothetical protein conserved	0.433848
7849	1	1	2	2	1	2	2	3	2	2	2	1	RNase P subunit Pop3/Ribosomal protein L7Ae/L30e/S12e/Gadd45 family PF08228|PF01248, 60S ribosomal protein L7a LPAL13_070010700	0.0558293
8034	0	3	0	1	1	1	1	0	0	0	0	0	hypothetical protein	0.488422
8041	0	1	0	0	0	5	4	5	2	1	0	0	hypothetical protein conserved	0.0126064
8044	0	1	0	0	1	4	4	4	3	1	0	0	short chain dehydrogenase/Enoyl-(Acyl carrier protein) reductase PF00106|PF13561, short chain dehydrogenase PF00106	0.0170219
8054	0	1	2	3	1	1	1	0	1	1	0	0	hypothetical protein conserved	0.408308
8059	0	1	0	0	0	2	1	0	1	8	0	0	hypothetical protein conserved	0.07064
8065	0	1	0	0	1	1	7	5	5	0	0	0	hypothetical protein conserved	0.100348
8073	0	4	0	1	0	0	0	2	0	0	0	0	hypothetical protein conserved	0.607236
8123	0	2	1	1	2	3	3	2	3	2	0	0	hypothetical protein conserved	0.0284597
8142	0	1	1	1	0	3	2	1	1	1	0	0	hypothetical protein conserved	0.0764156
8156	0	0	2	2	1	2	2	1	2	5	0	0	BT1 family PF03092, BT1 family LPAL13_140019100, BT1 family LPAL13_140019400	0.144698
8158	0	0	0	0	0	1	1	1	1	3	0	0	hypothetical protein conserved	0.00558362
8159	0	0	1	0	0	3	3	2	3	1	0	0	hypothetical protein conserved	0.0117514
8167	0	0	1	0	0	2	3	1	3	3	0	0	hypothetical protein conserved	0.0117514
8169	0	0	1	0	0	2	6	10	5	3	1	0	hypothetical protein conserved	0.00970079
8197	0	0	0	1	0	3	8	2	3	1	0	0	hypothetical protein conserved	0.0126064
8212	0	0	0	1	0	4	3	2	2	5	0	0	hypothetical protein conserved	0.00946735
8215	0	0	0	1	1	5	5	7	5	5	0	0	hypothetical protein conserved	0.00856192
8228	0	0	0	0	3	0	0	0	0	0	0	0	hypothetical protein conserved	0.423711
8249	0	0	0	0	0	13	12	2	12	1	0	1	Amastin surface glycoprotein Chr08	0.00729036
8254	0	0	0	0	0	3	3	2	3	3	0	0	hypothetical protein conserved	0.00558362
8260	0	0	0	0	0	4	4	0	4	3	0	0	hypothetical protein conserved	0.023151
8261	0	0	0	0	0	10	7	1	9	0	0	0	hypothetical protein conserved	0.0253699
8262	0	0	0	0	0	5	6	7	6	7	0	0	hypothetical protein conserved	0.00708872
8263	0	0	0	0	0	2	3	1	3	3	0	0	hypothetical protein conserved	0.00669438
8265	0	0	0	0	0	7	10	4	7	7	0	0	hypothetical protein conserved	0.00669438
8268	0	0	0	0	0	2	3	6	1	2	1	0	Amastin surface glycoprotein Chr08	0.00729036
8283	0	0	0	0	0	3	3	2	4	1	0	0	hypothetical protein conserved	0.00729036
8287	0	0	0	0	0	1	4	13	3	10	0	0	hypothetical protein conserved	0.00749496
8288	0	0	0	0	0	2	3	2	2	1	0	2	Amastin surface glycoprotein Chr20 PF07344	0.00669438
8296	0	0	0	0	0	14	20	7	11	4	0	0	Amastin surface glycoprotein Chr20 PF07344	0.00749496
8309	0	0	0	0	0	10	9	1	9	1	0	0	hypothetical protein conserved	0.00708872
8310	0	0	0	0	0	4	2	5	5	5	0	0	hypothetical protein conserved	0.00669438
8315	0	0	0	0	0	1	3	0	0	0	0	0	hypothetical protein conserved	0.179712
8332	0	0	0	0	0	3	3	3	4	2	0	0	hypothetical protein conserved	0.00669438
8349	0	0	0	0	0	4	2	7	5	2	0	0	hypothetical protein conserved	0.00729036
8350	0	0	0	0	0	3	3	3	2	3	0	0	hypothetical protein conserved	0.00558362
8359	0	0	0	0	0	2	2	3	2	2	0	0	hypothetical protein conserved	0.00558362
8360	0	0	0	0	0	3	15	11	8	1	0	0	hypothetical protein conserved	0.00749496
8361	0	0	0	0	0	1	1	2	3	5	0	0	hypothetical protein conserved	0.00729036
8380	0	0	0	0	0	3	2	2	3	3	0	0	hypothetical protein conserved	0.0065017
8387	0	0	0	0	0	1	3	0	0	0	0	0	Amastin surface glycoprotein Chr20	0.179712
8404	0	0	0	0	0	6	6	2	7	1	0	0	hypothetical protein conserved	0.00729036
8414	0	0	0	0	0	3	3	2	3	3	0	0	hypothetical protein conserved	0.00558362
8416	0	0	0	0	0	2	2	4	2	2	0	0	hypothetical protein conserved	0.00558362
8417	0	0	0	0	0	5	6	4	6	5	0	0	hypothetical protein conserved	0.00708872
8418	0	0	0	0	0	7	17	6	8	0	0	0	Amastin surface glycoprotein Chr20 PF07344	0.0253699
8419	0	0	0	0	0	3	16	12	10	1	0	0	hypothetical protein conserved	0.00749496
8445	0	0	0	0	0	3	3	3	4	5	0	0	hypothetical protein conserved	0.00669438
8461	0	0	0	0	0	1	1	3	0	3	0	0	hypothetical protein conserved	0.0242514
8466	0	0	0	0	0	3	16	11	7	1	0	0	hypothetical protein conserved	0.00749496
8473	0	0	0	0	0	2	7	1	1	0	0	0	hypothetical protein conserved	0.0248084
8484	0	0	0	0	0	3	6	0	14	4	0	0	hypothetical protein conserved	0.0253699
8519	0	0	0	0	0	1	1	3	1	3	0	0	hypothetical protein conserved	0.0065017
8529	0	0	0	0	0	1	0	0	1	4	0	0	hypothetical protein	0.0707011
8556	0	0	0	0	0	2	2	2	2	3	0	0	hypothetical protein conserved	0.00558362
8589	0	0	0	0	0	1	4	0	2	0	0	0	phosphoglycan beta 13 galactosyltransferase 2 LPAL13_000042300	0.0720057
8632	0	0	0	0	0	1	3	1	2	0	0	0	Amastin surface glycoprotein Chr20	0.0248084
8698	0	0	0	0	0	0	0	8	0	0	0	0	hypothetical protein conserved	0.423711
8700	0	0	0	0	0	0	0	28	0	0	0	0	hypothetical protein conserved	0.423711
8738	17	12	13	17	17	3	13	5	10	6	5	1	Peptidase family M3 PF01432, peptidyl dipeptidase LPAL13_270034000,Peptidase family M3 LPAL13_000005600 rank 1, Peptidase family M3 LPAL13_000005500	0.0259215
8739	29	23	26	16	22	27	26	39	28	22	7	1	Tubulin: beta-tubulin, Tubulin/FtsZ family GTPase domain/Tubulin C-terminal domain containing protein PF00091|PF03953, Tubulin C-terminal domain containing protein PF03953, Tubulin C-terminal domain containing protein LPAL13_000036800|LPAL13_210025500|LPAL13_330013200,beta tubulin LPAL13_000042100|LPAL13_340005200 rank 1, Tubulin/FtsZ family GTPase domain containing protein PF00091, beta tubulin …	0.293326
8740	26	11	5	4	7	2	1	25	5	2	2	2	hypothetical protein conserved	0.171904
8741	0	0	0	0	1	1	0	5	6	0	0	0	hypothetical protein conserved	0.193816
8742	28	31	38	40	19	7	9	6	6	11	5	0	Amastin surface glycoprotein Chr20 PF07344	0.0119252
8743	14	6	4	7	3	7	15	11	6	5	1	0	Amastin surface glycoprotein Chr20 PF07344	0.400525
8744	26	9	8	25	11	4	18	21	13	0	9	0	Reverse transcriptase (RNA-dependent DNA polymerase) PF00078	0.547619
8745	30	21	54	41	43	26	25	14	22	19	32	4	Leishmanolysin PF01457, Leishmanolysin LPAL13_000023600|LPAL13_100010000|LPAL13_100010500,major surface protease gp63 LPAL13_100010100|LPAL13_100010200|LPAL13_100010600 rank 1, Leishmanolysin LPAL13_100010400,major surface protease gp63 LPAL13_000016400|LPAL13_100009700|LPAL13_100009800 rank 1, GP63 leishmanolysin LbrM0550|LbrM0560|LbrM0570|LbrM0590|LbrM0610|LbrM0620|LbrM0630|LbrM0640|LbrM0650|Lb…	0.0555556
8746	8	16	21	14	17	0	0	0	0	0	0	0	hypothetical protein conserved	0.00749496
8747	0	0	0	0	0	19	19	9	12	14	0	0	hypothetical protein conserved	0.00729036
8748	15	11	13	14	9	7	8	9	6	7	0	0	hypothetical protein conserved	0.0156505
8749	5	3	6	3	2	6	8	5	6	8	0	0	hypothetical protein conserved	0.0425634
8750	1	1	2	5	1	22	41	14	16	2	1	1	hypothetical protein conserved	0.0259215
8751	6	8	4	6	6	12	9	10	10	6	2	1	Peptidase family M20/M25/M40/Peptidase dimerisation domain containing protein PF01546|PF07687, peptidase m20/m25/m40 family-like protein LPAL13_330023800	0.0399624
8752	4	9	9	6	5	4	4	4	7	4	2	2	Amastin surface glycoprotein Chr08 PF07344	0.117525
8753	7	17	18	9	13	0	0	0	0	16	3	0	Amastin surface glycoprotein Chr08 PF07344	0.0524116
8755	5	6	7	12	6	6	5	6	6	5	8	0	phosphoglycan beta 13 galactosyltransferase LPAL13_020006400|LPAL13_020006700|LPAL13_020006900|LPAL13_020007000	0.258533
8756	4	5	5	5	5	5	5	4	5	5	6	2	Stealth protein CR3 conserved region 3 PF17102, Protein of unknown function (DUF3184) LPAL13_160013900|LPAL13_160014600|LPAL13_160014700	1
8757	32	15	56	10	12	27	32	57	49	10	37	3	Phage integrase family PF00589, TATE DNA Transposon LbrM,32,0010	0.528359
8758	5	7	17	8	9	6	2	2	4	5	0	0	Amastin surface glycoprotein Chr20 PF07344	0.0273285

## Sheet: MLST
Gene	Description	ID M2904	Chromosome	Start	End	identificar regiomes
ICD	Isocitrate dehydrogenase	LbrM.33.2820	33	1096673	1097950
GPI	Glucose phosfate isomerase	LbrM.12.0490	12	194933	196678
ACON	Aconitate Hydratase	LbrM.18.0560	18	210778	209513
MDH	Malate dehydrogenase	LbrM.20.0030	20/34	10214	9261
G6PDH	Glucose -6-phosphate 1-dehydrogenase	LbrM.20.0160	20/34	52457	54142
PGM	Phospho glucomutase	LbrM.21.0700	21	192813	191044
ACP	Acide phosfatase	LbrM. 23.1290	23	506246	508090
FUM	Fumarase	LbrM.24.0320	24	95772	97421
ME	Malic enzyme	LbrM.24.0780	24	271144	272859
NH	Nucleoside Hydrolase	LbrM.29.2850	29	1142389	1141388
HK	Homoserine Kinase	LbrM.30.3070	30	1064343	1063318
MPI	Manose Phosphatase Isomerase	LbrM.32.1750	32	632943	631657
6PGDH	6-phosphogluconate dehydrogenase	LbrM.34.3250	35	1274163	1272724	todos -i
NADP	Isocitrate dehydrogenase mitochondrial	LbrM.10.0310	10	116720	118027
HSP70			28			A10	NC_009320.2_RagTag	1120655	1119276	rev
						A23	NC_009320.2_RagTag	1095235	1093856	rev
						A53	NC_009320.2_RagTag	1107565	1106186	rev
